# Supplementary material for: Nitrite Cycling in the Primary Nitrite Maxima of the Eastern Tropical North Pacific
Source: Copernicus journal article supplement (doi:10.5194/bg-2022-137), 2022-06-27
Supplement: Supplementary file 1 [file bg-2022-137-supplement-version3.pdf]

1 **Supplemental Tables and Figures**

2

3 **Table S1. In situ rate measurements** – Data from all four cruises to the ETNP (a) Source water data for all stations  
 4 and depths where experimental rates are reported. Some ammonium concentrations reported were below the 30nM  
 5 detection limit for the quantitation method used (b) Rate measurements for ammonia oxidation, nitrite oxidation,  
 6 nitrate reduction and nitrite uptake. Table shows standard deviation and limit of detection for experimental bottle  
 7 replicates associated with each rate measurement. Replicate bottles for nitrite uptake measurements were combined  
 8 in order to maximize particulate nitrogen content prior to isotope analysis, and therefore do not have an associated  
 9 standard deviation. Nitrite uptake rates have been bolded when particulate nitrogen content was below the typical  
 10 quantity (c) Rate means and p-values for coastal vs offshore stations. Median rates are also shown.

11

12 (a)

| Cruise   | Depth (m) | Station | Region   | Cast | Longitude (W) | Latitude (N) | SigmaT (g kg <sup>-1</sup> ) | Salinity (ppt) | TempC (C) | Oxygen (uM) | NO2 (uM) | NO3 (uM) | NH4 (nM) | Chl (mg m <sup>-2</sup> ) | pPAR (%) | PNM_dept (m) | PNM_max (uM) |
|----------|-----------|---------|----------|------|---------------|--------------|------------------------------|----------------|-----------|-------------|----------|----------|----------|---------------------------|----------|--------------|--------------|
| Ward     | 60        | PS1     | Offshore | 17   | -113.0        | 10.0         | 23.86                        | 34.39          | 21.63     | 88.53       | 0.79     | 12.06    | 19.7     | 2.42                      | 1%       | 55           | 1.49         |
| Ward     | 55        | PS1     | Offshore | 9    | -113.0        | 10.0         | 23.57                        | 34.29          | 22.42     | 86.46       | 1.08     | 12.2     | 68.5     | 3.17                      | 2%       | 60           | 1.52         |
| Ward     | 60        | PS1     | Offshore | 9    | -113.0        | 10.0         | 23.86                        | 34.37          | 21.57     | 68.2        | 0.75     | 14.79    | 9        | 2.72                      | 1%       | 60           | 1.52         |
| Ward     | 65        | PS1     | Offshore | 9    | -113.0        | 10.0         | 24.25                        | 34.47          | 20.42     | 45.27       | 0.44     | 17.55    | 0        | 2.49                      | 1%       | 60           | 1.52         |
| Ward     | 70        | PS1     | Offshore | 9    | -113.0        | 10.0         | 25.1                         | 34.64          | 17.6      | 8.04        | 0.05     | 17.15    | 9        | 2.53                      | 0%       | 60           | 1.52         |
| Ward     | 75        | PS2     | Offshore | 36   | -105.0        | 15.8         | 24.73                        | 34.42          | 18.39     | 63.17       | 0.75     | 14.99    | 5        | 1.47                      | 2%       | 63           | 0.62         |
| Ward     | 70        | PS2     | Offshore | 44   | -105.0        | 15.8         | 23.51                        | 34.48          | 23.13     | 196.34      | 0.18     | 0.61     | 25       | 3.13                      | 3%       | 80           | 0.48         |
| Ward     | 80        | PS2     | Offshore | 44   | -105.0        | 15.8         | 24.84                        | 34.3           | 17.57     | 86.22       | 0.48     | 12.66    | 25       | 1.77                      | 1%       | 80           | 0.48         |
| Ward     | 30        | PS3     | Coastal  | 75   | -102.4        | 17.7         | 24.75                        | 34.59          | 18.83     | 31.64       | 0.47     | 19.03    | 29       | 3.28                      | 1%       | 21           | 0.65         |
| Ward     | 30        | PS3     | Coastal  | 87   | -102.4        | 17.7         | 24.34                        | 34.5           | 20.17     | 65.03       | 0.52     | 19.38    | 25       | 1.93                      | 3%       | 30           | 0.52         |
| Ward     | 20        | PS3     | Coastal  | 83   | -102.4        | 17.7         | 23.89                        | 34.49          | 21.79     | 120.03      | 0.47     | 3.57     | 5        | 4.03                      | 2%       | 25           | 1.3          |
| Ward     | 25        | PS3     | Coastal  | 83   | -102.4        | 17.7         | 24.36                        | 34.56          | 20.26     | 41.66       | 1.3      | 12.14    | 5        | 3.96                      | 1%       | 25           | 1.3          |
| Falkor   | 70        | F2      | Offshore | 5    | -103.0        | 14.0         | 24.28                        | 34.48          | 20.34     | 79          | 0.31     | 13.61    | 25       | 0.4                       | 3%       | 60           | 0.76         |
| Falkor   | 65        | F9      | Offshore | 16   | -110.0        | 14.0         | 22.7                         | 34.07          | 24.8      | 150         | 0.39     | 7.56     | 20       | 0.65                      | 1%       | 65           | 0.39         |
| Falkor   | 50        | F9      | Offshore | 19   | -110.0        | 14.0         | 22.16                        | 33.99          | 26.35     | 185.1       | 0.15     | 23.47    | 59       | 0.94                      | 2%       | 70           | 0.2          |
| HODZ     | 25        | P1      | Coastal  | 27   | -106.2        | 20.3         | 23.4                         | 34.58          | 23.75     | 182.18      | 0        | 0.35     | 38.64    | 2.8                       | 6%       | 35           | 0.35         |
| HODZ     | 30        | P1      | Coastal  | 27   | -106.2        | 20.3         | 24.07                        | 34.55          | 21.28     | 142.92      | 0.18     | 3.07     | 87.56    | 9.78                      | 4%       | 35           | 0.35         |
| HODZ     | 35        | P1      | Coastal  | 27   | -106.2        | 20.3         | 24.39                        | 34.56          | 20.14     | 87.82       | 0.35     | 10.84    | 17.27    | 1.67                      | 3%       | 35           | 0.35         |
| HODZ     | 45        | P1      | Coastal  | 27   | -106.2        | 20.3         | 24.8                         | 34.53          | 18.46     | 53.27       | 0.05     | 16.19    | 54.4     | 0.69                      | 1%       | 35           | 0.35         |
| HODZ     | 25        | P1      | Coastal  | 20   | -106.1        | 20.2         | 23.78                        | 34.54          | 22.28     | 169.16      | 0.05     | 0.79     | 90       | 5.94                      | 6%       | 30           | 0.47         |
| HODZ     | 30        | P1      | Coastal  | 20   | -106.1        | 20.2         | 24.12                        | 34.49          | 20.95     | 112.15      | 0.47     | 6.22     | 80       | 3.81                      | 4%       | 30           | 0.47         |
| HODZ     | 40        | P1      | Coastal  | 20   | -106.1        | 20.2         | 24.72                        | 34.53          | 18.78     | 57.68       | 0.22     | 16.35    | 30       | 0.71                      | 2%       | 30           | 0.47         |
| HODZ     | 60        | P1      | Coastal  | 20   | -106.1        | 20.2         | 25.22                        | 34.57          | 16.83     | 22.19       | 0.05     | 19.52    | 0        | 0.33                      | 0%       | 30           | 0.47         |
| HODZ     | 50        | P2      | Offshore | 35   | -107.2        | 16.4         | 21.56                        | 33.73          | 27.64     | 183.12      | 0.13     | 2.02     | 362.18   | 1.33                      | 17%      | 55           | 0.99         |
| HODZ     | 55        | P2      | Offshore | 35   | -107.2        | 16.4         | 22.91                        | 34.3           | 24.68     | 145.88      | 0.99     | 4.24     | 28.13    | 1.57                      | 6%       | 55           | 0.99         |
| HODZ     | 65        | P2      | Offshore | 35   | -107.2        | 16.4         | 23.7                         | 34.43          | 22.31     | 83          | 0.05     | 20.45    | 0        | 0.78                      | 3%       | 55           | 0.99         |
| ETNP2016 | 55        | 3       | Coastal  | 6    | -110.2        | 22.6         | 24.04                        | 34.43          | 20.83     | 209.9       | 0.15     | 0.4      | 158.26   | 0.24                      | 4%       | 72.88        | 0.06         |
| ETNP2016 | 75        | 3       | Coastal  | 6    | -110.2        | 22.6         | 24.72                        | 34.33          | 18.13     | 158.22      | 0.47     | 5.18     | 24.3     | 0.26                      | 1%       | 72.88        | 0.06         |
| ETNP2016 | 100       | 3       | Coastal  | 6    | -110.2        | 22.6         | 25.46                        | 34.38          | 15.02     | 61.14       | 0.05     | 18       | 25.76    | 0.08                      | 0%       | 72.88        | 0.06         |
| ETNP2016 | 120       | 3       | Coastal  | 6    | -110.2        | 22.6         | 25.82                        | 34.49          | 13.83     | 40.51       | 0        | 24.35    | 15.51    | 0.06                      | 0%       | 72.88        | 0.06         |
| ETNP2016 | 25        | 6       | Coastal  | 14   | -104.4        | 18.7         | 23.39                        | 34.41          | 25.12     | 204.1       | 0.08     | 1.21     | 64.92    | 0.33                      | 8%       | 43.14        | 0.85         |
| ETNP2016 | 40        | 6       | Coastal  | 14   | -104.4        | 18.7         | 24.13                        | 34.52          | 20.56     | 57.17       | 0.18     | 18.93    | 33.94    | 0.27                      | 1%       | 43.14        | 0.85         |
| ETNP2016 | 55        | 6       | Coastal  | 14   | -104.4        | 18.7         | 24.95                        | 34.61          | 17.78     | 14.74       | 0.12     | 22.27    | 25       | 0.13                      | 1%       | 43.14        | 0.85         |
| ETNP2016 | 75        | 6       | Coastal  | 14   | -104.4        | 18.7         | 25.46                        | 34.75          | 15.28     | 0.89        | 0.1      | 23.91    | 24.93    | 0.14                      | 0%       | 43.14        | 0.85         |
| ETNP2016 | 35        | 9       | Coastal  | 23   | -99.0         | 15.0         | 22.76                        | 34.33          | 23.65     | 129.52      | 0.52     | 0.49     | 212      | 0.39                      | 7%       | 70.63        | 1.36         |
| ETNP2016 | 40        | 9       | Coastal  | 23   | -99.0         | 15.0         | 23.62                        | 34.43          | 21.82     | 57.17       | 0.82     | 17.93    | 46       | 0.42                      | 3%       | 70.63        | 1.36         |
| ETNP2016 | 50        | 9       | Coastal  | 23   | -99.0         | 15.0         | 24.38                        | 34.57          | 19.4      | 20.99       | 0.22     | 20.89    | 37       | 0.25                      | 1%       | 70.63        | 1.36         |
| ETNP2016 | 60        | 9       | Coastal  | 23   | -99.0         | 15.0         | 24.84                        | 34.64          | 17.9      | 8.04        | 0.15     | 22.26    | 44       | 0.16                      | 0%       | 70.63        | 1.36         |
| ETNP2016 | 10        | 12      | Offshore | 32   | -106.1        | 16.3         | 21.25                        | 33.48          | 28.02     | 192.49      | 0        | 0.52     | 0        | 0.06                      | 20%      | 102.95       | 0.66         |
| ETNP2016 | 75        | 12      | Offshore | 32   | -106.1        | 16.3         | 22.39                        | 34.13          | 25.96     | 203.21      | 0        | 0.61     | 0        | 0.1                       | 1%       | 102.95       | 0.66         |
| ETNP2016 | 85        | 12      | Offshore | 32   | -106.1        | 16.3         | 22.63                        | 34.19          | 25.34     | 209.91      | 0.09     | 0.09     | 11.4     | 0.14                      | 0%       | 102.95       | 0.66         |
| ETNP2016 | 95        | 12      | Offshore | 32   | -106.1        | 16.3         | 23.34                        | 34.35          | 23.37     | 168.82      | 0.22     | 4.92     | 34.8     | 0.21                      | 0%       | 102.95       | 0.66         |
| ETNP2016 | 100       | 12      | Offshore | 32   | -106.1        | 16.3         | 23.97                        | 34.44          | 21.38     | 103.61      | 0.44     | 7.61     | 17       | 0.17                      | 0%       | 102.95       | 0.66         |
| ETNP2016 | 62        | 16      | Offshore | 39   | -111.9        | 19.9         | 23.98                        | 34.42          | 21.29     | 206.42      | 0        | 0.63     | 247.5    | 0.22                      | 4%       | 87.79        | 0.3          |
| ETNP2016 | 72        | 16      | Offshore | 39   | -111.9        | 19.9         | 24.14                        | 34.33          | 20.41     | 184.55      | 0.46     | 2.93     | 381.52   | 0.24                      | 2%       | 87.79        | 0.3          |
| ETNP2016 | 80        | 16      | Offshore | 39   | -111.9        | 19.9         | 24.32                        | 34.25          | 19.49     | 166.06      | 0.21     | 4.87     | 296.45   | 0.23                      | 1%       | 87.79        | 0.3          |

13 (b)

| Cruise   | Depth (m) | Station | NH3.Ox1 (nM d <sup>-1</sup> ) | Stdev_4 | LOD_4 | NO2.Ox1 (nM d <sup>-1</sup> ) | Stdev_2 | LOD_2 | NO3.Red1 (nM d <sup>-1</sup> ) | Stdev_3 | LOD_3 | NO2.up (nM d <sup>-1</sup> ) | NetNit1 | Net.Nitrif | NetPI   | NetN1   |
|----------|-----------|---------|-------------------------------|---------|-------|-------------------------------|---------|-------|--------------------------------|---------|-------|------------------------------|---------|------------|---------|---------|
| Ward     | 60        | PS1     | 7.65                          | 0.37    | 0.16  | 6.72                          | 4.53    | 0.6   | 0.3                            | 0.58    | -0.23 | <b>5.44</b>                  | 0.92    | -3.75      | -5.14   | -4.22   |
| Ward     | 55        | PS1     | 13.66                         | 3.39    | 0.47  | 4.96                          | 3.68    | 1.45  | 5.62                           | 1.17    | n.d.  | <b>9.49</b>                  | 8.7     | 4.19       | -3.87   | 4.83    |
| Ward     | 60        | PS1     | 11.65                         | 4.28    | 0.69  | -0.94                         | 0.7     | 1.7   | 3.78                           | 0.18    | n.d.  | <b>6.04</b>                  | 12.59   | 8.73       | -2.26   | 10.33   |
| Ward     | 65        | PS1     | 21.59                         | 2.24    | 0.95  | 1.9                           | n.d.    | 2.77  | 3.48                           | 0.71    | n.d.  | <b>3.74</b>                  | 19.69   | 17.43      | -0.26   | 19.43   |
| Ward     | 70        | PS1     | 20.27                         | 1.23    | 1.09  | 18.58                         | 1.08    | 1.73  | 1.89                           | 0.22    | n.d.  | <b>2.01</b>                  | 1.69    | 7.9        | -0.11   | 1.57    |
| Ward     | 75        | PS2     | 28.78                         | 0.46    | 0.16  | 40.32                         | 5.43    | 37.18 | 9.14                           | 1.26    | n.d.  | <b>8.6</b>                   | -11.54  | -25.95     | 0.54    | -11     |
| Ward     | 70        | PS2     | -1.2                          | 0.11    | 0.12  | -2.62                         | 0.52    | 3.26  | n.d.                           | n.d.    | n.d.  | <b>10.43</b>                 | 1.43    | 2.07       | n.d.    | n.d.    |
| Ward     | 80        | PS2     | 44.09                         | 1.68    | 0.74  | 87.4                          | 11.58   | 53.86 | n.d.                           | n.d.    | n.d.  | <b>2.32</b>                  | -43.31  | -43.11     | n.d.    | n.d.    |
| Ward     | 30        | PS3     | 90.42                         | 1.95    | 0.09  | 60.48                         | 2.11    | 0.85  | 5.82                           | 0.82    | n.d.  | 4                            | 29.94   | 33.45      | 1.82    | 31.75   |
| Ward     | 30        | PS3     | 68.59                         | 2.69    | 1.19  | 42.82                         | 1.71    | 0.88  | 1.43                           | 0.44    | n.d.  | 3.82                         | 25.77   | 26.93      | -2.39   | 23.38   |
| Ward     | 20        | PS3     | -1.32                         | 0.35    | 0.21  | -5.54                         | 3.71    | 19.34 | 1.24                           | 0.78    | n.d.  | 2.28                         | 4.22    | -2.7       | -1.04   | 3.18    |
| Ward     | 25        | PS3     | 7.09                          | 3.2     | 1.12  | 78.56                         | 1.6     | 24.95 | 1.58                           | 0.22    | n.d.  | 1.24                         | -71.47  | -49.61     | 0.34    | -71.14  |
| Falkor   | 70        | F2      | 57.01                         | 34.07   | n.d.  | 24.36                         | 0.62    | n.d.  | n.d.                           | n.d.    | n.d.  | 1.06                         | 32.64   | 47.94      | n.d.    | n.d.    |
| Falkor   | 65        | F9      | 20.5                          | 1.76    | n.d.  | 11.1                          | 4.98    | n.d.  | n.d.                           | n.d.    | n.d.  | n.d.                         | 9.41    | 7.87       | n.d.    | n.d.    |
| Falkor   | 50        | F9      | 1.83                          | 0.63    | n.d.  | 5.07                          | 12.36   | n.d.  | n.d.                           | n.d.    | n.d.  | n.d.                         | -3.24   | -9.98      | n.d.    | n.d.    |
| HODZ     | 25        | P1      | 3.63                          | 0.06    | 0.04  | -9.2                          | 0       | n.d.  | 0                              | 0       | n.d.  | 112.74                       | 12.84   | 1.56       | -112.74 | -99.9   |
| HODZ     | 30        | P1      | 8.66                          | 0.05    | 0.18  | -15.04                        | 5.99    | n.d.  | 49.13                          | 1.02    | n.d.  | 165                          | 23.7    | 2.08       | -115.88 | -92.18  |
| HODZ     | 35        | P1      | 50.45                         | 2.92    | 0.95  | -4.09                         | 1.1     | n.d.  | 33.23                          | 5.96    | n.d.  | 18.79                        | 54.55   | 54.55      | 14.43   | 68.98   |
| HODZ     | 45        | P1      | 49.85                         | 3.89    | 1.51  | 34.96                         | 0.47    | n.d.  | 3.54                           | 1.6     | n.d.  | 4.4                          | 14.89   | 14.89      | -0.86   | 14.02   |
| HODZ     | 25        | P1      | 4.42                          | 1.24    | 0.26  | 29.94                         | n.d.    | n.d.  | 0                              | 0       | n.d.  | 123.26                       | -25.52  | 2.39       | -123.26 | -148.78 |
| HODZ     | 30        | P1      | 15.73                         | 3.08    | 0.7   | 13.03                         | 4.8     | n.d.  | 53.15                          | 2.15    | n.d.  | 49.41                        | 2.71    | 8.51       | 3.74    | 6.44    |
| HODZ     | 40        | P1      | 26.18                         | 4.41    | 1.22  | 45.73                         | 4.18    | n.d.  | 1.92                           | 0.51    | n.d.  | 10.83                        | -19.55  | -19.55     | -8.91   | -28.46  |
| HODZ     | 60        | P1      | 16.87                         | 0.09    | 0.98  | 18.35                         | 1.92    | n.d.  | 0                              | 0       | n.d.  | <b>0.66</b>                  | -1.48   | -1.48      | -0.66   | -2.14   |
| HODZ     | 50        | P2      | -3.15                         | 1.05    | 1     | n.d.                          | n.d.    | n.d.  | -1.18                          | 0.77    | n.d.  | 3.99                         | n.d.    | n.d.       | -5.16   | n.d.    |
| HODZ     | 55        | P2      | 2.11                          | 1.08    | 0.4   | 13.41                         | 1.91    | n.d.  | 2.06                           | 0.23    | n.d.  | 7.34                         | -11.31  | -8.48      | -5.27   | -16.58  |
| HODZ     | 65        | P2      | 71.2                          | 1.32    | 2.06  | 46.63                         | 2.71    | n.d.  | 13.12                          | 6.29    | n.d.  | 6.97                         | 24.56   | 24.56      | 6.15    | 30.71   |
| ETNP2016 | 55        | 3       | 0.76                          | 0.06    | 0.06  | 8.4                           | 0.14    | -0.17 | n.d.                           | n.d.    | n.d.  | 46.95                        | -7.64   | 0.66       | n.d.    | n.d.    |
| ETNP2016 | 75        | 3       | 28.17                         | 9.34    | 0.83  | 29.25                         | 2.12    | 0.99  | -2.3                           | n.d.    | n.d.  | 8.85                         | -1.08   | 5.13       | -11.15  | -12.23  |
| ETNP2016 | 100       | 3       | 28.72                         | 1.49    | 0.92  | 34.83                         | 13.7    | 0.94  | 1.5                            | n.d.    | 0.19  | 1.07                         | -6.11   | -10        | 0.43    | -5.68   |
| ETNP2016 | 120       | 3       | 10.38                         | 1.5     | 1.01  | 14.59                         | 0.88    | 1.55  | 0                              | n.d.    | 0     | 1.07                         | -4.21   | 1.34       | -1.07   | -5.28   |
| ETNP2016 | 25        | 6       | 2.32                          | 0.97    | 0.08  | -8.97                         | 27.06   | n.d.  | 7.39                           | 1.85    | 0.1   | 46.8                         | 11.3    | 4.09       | -39.41  | -28.11  |
| ETNP2016 | 40        | 6       | 46.83                         | 2.92    | 1.1   | 31.88                         | 3.02    | n.d.  | 5.56                           | 1.08    | -0.1  | <b>3.5</b>                   | 14.95   | 8.75       | 2.07    | 17.01   |
| ETNP2016 | 55        | 6       | 42.59                         | 5.33    | 1.67  | 34                            | 1.38    | n.d.  | 3.07                           | 1.56    | -0.08 | <b>0.69</b>                  | 8.59    | 17.42      | 2.38    | 10.97   |
| ETNP2016 | 75        | 6       | 8.36                          | 1.89    | 0.81  | 20.98                         | 0.56    | n.d.  | 2.18                           | 0.36    | 0.4   | n.d.                         | -12.62  | -5.66      | 2.18    | -10.45  |
| ETNP2016 | 35        | 9       | 15.42                         | 6.28    | 0.44  | 1.71                          | 2.37    | n.d.  | 0.12                           | 0       | 0.01  | 6.64                         | 13.71   | 8.35       | -6.52   | 7.19    |
| ETNP2016 | 40        | 9       | 73.84                         | 1.12    | 1.16  | 5.48                          | 0.43    | n.d.  | 12.33                          | 1.9     | 1.33  | 7.18                         | 68.37   | 30.34      | 5.15    | 73.52   |
| ETNP2016 | 50        | 9       | 59.28                         | 16.31   | 1.62  | 20.89                         | 0.2     | n.d.  | 0.41                           | 0.49    | 0     | <b>3.35</b>                  | 38.39   | 33.16      | -2.94   | 35.45   |
| ETNP2016 | 60        | 9       | 13.63                         | 4.46    | 1.93  | 7.54                          | 1.53    | n.d.  | 0.04                           | 0       | 0.01  | <b>0.54</b>                  | 6.09    | 6.75       | -0.5    | 5.59    |
| ETNP2016 | 10        | 12      | -0.42                         | 0.1     | 0.05  | n.d.                          | n.d.    | n.d.  | n.d.                           | n.d.    | n.d.  | n.d.                         | n.d.    | -0.42      | n.d.    | n.d.    |
| ETNP2016 | 75        | 12      | 2.85                          | 0.4     | 0.06  | 25.64                         | 6.93    | n.d.  | 0.9                            | 0.22    | -0.01 | 19.04                        | -22.79  | -21.63     | -18.14  | -40.93  |
| ETNP2016 | 85        | 12      | 0.04                          | 0.04    | -0.03 | 0.37                          | 37.79   | n.d.  | 0.04                           | 0.01    | 0     | 17.4                         | -0.33   | -0.06      | -17.36  | -17.7   |
| ETNP2016 | 95        | 12      | 30.19                         | 0.09    | 0.26  | n.d.                          | n.d.    | n.d.  | 0.06                           | 0.04    | 0.04  | 21.26                        | n.d.    | n.d.       | -21.2   | n.d.    |
| ETNP2016 | 100       | 12      | 32.15                         | 0.76    | 0.48  | 5.8                           | 0.08    | n.d.  | 0.78                           | 0.3     | 0.63  | 11.18                        | 26.36   | 27.09      | -10.41  | 15.95   |
| ETNP2016 | 62        | 16      | 0.55                          | 0.16    | 0     | n.d.                          | n.d.    | n.d.  | n.d.                           | n.d.    | n.d.  | n.d.                         | n.d.    | n.d.       | n.d.    | n.d.    |
| ETNP2016 | 72        | 16      | 31.52                         | 3       | 0     | n.d.                          | n.d.    | n.d.  | n.d.                           | n.d.    | n.d.  | n.d.                         | n.d.    | n.d.       | n.d.    | n.d.    |
| ETNP2016 | 80        | 16      | 53.57                         | 3.4     | 0     | n.d.                          | n.d.    | n.d.  | n.d.                           | n.d.    | n.d.  | n.d.                         | n.d.    | n.d.       | n.d.    | n.d.    |

14 15 (c)

| Rates                  | Median  |          | Mean    |          | t-value | p-value |
|------------------------|---------|----------|---------|----------|---------|---------|
|                        | Coastal | Offshore | Coastal | Offshore |         |         |
| Ammonia Oxidation      | 16.3    | 16.97    | 28.0    | 20.3     | 1.093   | 0.281   |
| Nitrite Oxidation      | 19.62   | 8.91     | 20.4    | 18.0     | 0.318   | 0.752   |
| Nitrate Reduction      | 1.58    | 1.89     | 7.88    | 3.08     | 1.410   | 0.170   |
| Nitrite Uptake         | 4.2     | 7.15     | 25.96   | 8.52     | 1.874   | 0.073   |
| Net Nitrite Production | 3.18    | 1.57     | -8.99   | -0.69    | -0.667  | 0.510   |

17 **Table S2. Table of Station Summary Features** – (a) Station specific water column features are listed for each  
 18 station from the 2016 PPS dataset. (b) Means are presented in the second table for all stations in the PPS2016  
 19 dataset, as well as means for the ‘offshore’ and ‘coastal’ station groupings (13,14,15,16 and 6,7,8,9, respectively).  
 20 (c) Table of regression coefficients for water column features versus concentrations of the nitrite maxima and depth  
 21 of the nitrite maxima.

22 (a)

| Summary of PPS Stations |       |       |       |        |        |        |        |        |        |       |        |       |       |       |       |       |
|-------------------------|-------|-------|-------|--------|--------|--------|--------|--------|--------|-------|--------|-------|-------|-------|-------|-------|
| Station                 | 1.0   | 2.0   | 3.0   | 4.0    | 5.0    | 6.0    | 7.0    | 8.0    | 9.0    | 10.0  | 11.0   | 12.0  | 13.0  | 14.0  | 15.0  | 16.0  |
| PNM_max                 | 0.3   | 0.4   | 0.1   | 0.3    | 0.7    | 0.8    | 1.0    | 1.2    | 1.4    | 0.5   | 0.5    | 0.7   | 0.5   | 0.5   | 0.8   | 0.3   |
| PNM_depth               | 70.6  | 102.0 | 72.9  | 53.4   | 66.7   | 42.1   | 56.9   | 38.1   | 45.2   | 81.2  | 76.8   | 103.0 | 92.5  | 96.0  | 99.2  | 86.1  |
| PNM_top                 | 60.5  | 80.8  | 64.1  | 47.2   | 58.7   | 26.8   | 27.0   | 28.7   | 38.8   | NA    | 66.5   | 92.4  | 78.8  | 80.5  | 94.2  | 81.2  |
| PNM_sig                 | 24.5  | 24.7  | 24.5  | 23.7   | 24.5   | 22.7   | 24.1   | 23.2   | 23.8   | 23.7  | 23.9   | 24.1  | 24.5  | 22.3  | 24.1  | 23.1  |
| Temp_max                | 19.6  | 21.0  | 21.9  | 24.3   | 25.2   | 25.9   | 26.6   | 27.3   | 28.7   | 29.5  | 29.2   | 28.0  | 27.7  | 26.0  | 27.0  | 24.0  |
| TempPNM                 | 18.9  | 18.0  | 18.8  | 22.4   | 19.6   | 19.2   | 20.9   | 23.7   | 21.8   | 22.2  | 21.4   | 21.0  | 19.2  | 19.5  | 20.9  | 19.2  |
| NH4PNM                  | 0.3   | 0.0   | 0.1   | 0.0    | 0.0    | 0.1    | 0.0    | 0.2    | 0.0    | 0.0   | 0.0    | 0.0   | 0.0   | 0.0   | 0.0   | 0.0   |
| MLD                     | 71.1  | 75.8  | 54.0  | 14.7   | 28.1   | 20.2   | 22.8   | 21.0   | 16.3   | 24.6  | 25.6   | 45.0  | 19.6  | 20.3  | 36.9  | 14.8  |
| Chl_max                 | 4.5   | 4.7   | 8.9   | 7.1    | 7.0    | 14.2   | 9.9    | 48.5   | 11.1   | 12.2  | 7.8    | 6.2   | 6.1   | 5.4   | 5.0   | 9.5   |
| PARChl                  | 0.7   | 0.8   | 0.6   | 1.2    | 1.3    | 1.5    | 1.7    | 4.1    | 1.5    | 1.9   | 0.4    | 0.3   | 6.8   | 2.9   | 0.7   | 1.6   |
| Chl_depth               | 69.2  | 75.0  | 78.7  | 66.6   | 48.5   | 34.3   | 52.4   | 36.9   | 46.2   | 64.4  | 74.1   | 90.2  | 63.0  | 69.6  | 89.5  | 76.7  |
| Chl_sig                 | 24.5  | 24.3  | 24.7  | 24.0   | 23.7   | 23.9   | 23.8   | 23.2   | 23.9   | 22.3  | 23.6   | 23.2  | 23.0  | 23.2  | 23.4  | 24.1  |
| Nitracline              | 96.6  | 105.0 | 79.7  | 54.2   | 54.3   | 55.9   | 61.2   | 38.7   | 41.8   | 81.9  | 75.0   | 93.6  | 93.2  | 110.0 | 118.0 | 110.0 |
| Nitracline_top          | 69.7  | 102.0 | 60.2  | 50.2   | 53.7   | 31.1   | 34.0   | 29.8   | 40.0   | 74.2  | 72.6   | 93.2  | 81.5  | 90.2  | 95.0  | 83.8  |
| NitPNM                  | 1.3   | 1.7   | 8.5   | 5.3    | 9.4    | 14.3   | 20.1   | 19.5   | 12.9   | 7.7   | 15.6   | 8.7   | 7.3   | 4.4   | 7.4   | 2.1   |
| NitChl                  | 1.1   | NaN   | 12.1  | 16.7   | -0.1   | 4.5    | 8.6    | 15.2   | 13.1   | 0.9   | 5.2    | 0.0   | 0.4   | 0.2   | 0.9   | 0.0   |
| ChlPNM                  | 4.2   | 1.6   | 3.6   | 1.4    | 2.4    | 1.6    | 5.0    | 28.1   | 5.2    | 4.7   | 3.0    | 2.2   | 2.0   | 2.7   | 2.7   | 3.0   |
| Oxyceline_top           | 65.0  | 65.0  | 63.7  | 52.8   | 40.0   | 22.0   | 42.0   | 32.8   | 33.0   | 58.0  | 65.0   | 85.0  | 60.0  | 60.0  | 85.0  | 70.0  |
| OxyPNM                  | 227.0 | 151.0 | 173.0 | 219.0  | 101.0  | 31.5   | 63.7   | 149.0  | 56.7   | 85.6  | 65.8   | 74.8  | 63.2  | 120.0 | 86.6  | 164.0 |
| pPAR1                   | 64.8  | 74.8  | 73.2  | NA     | 50.9   | 38.3   | 57.1   | 45.6   | 49.0   | 70.2  | 64.4   | 86.4  | NA    | 84.1  | 84.9  | 83.3  |
| PARPNM                  | 0.7   | 0.2   | 1.0   | 3.8    | 0.2    | 0.7    | 1.0    | 3.1    | 1.8    | 0.3   | 0.7    | 0.1   | 0.5   | 0.3   | 0.3   | 0.8   |
| PNM_dist_Nittop         | 1.0   | 0.4   | 12.7  | 3.2    | 13.0   | -29.1  | 22.9   | 8.2    | 4.7    | 6.9   | 4.3    | 9.8   | 11.0  | -87.7 | 16.9  | -81.3 |
| PNM_dist_Oxytop         | 41.4  | NA    | 9.2   | 0.6    | 38.8   | NA     | 28.7   | 5.2    | 22.2   | 53.3  | 48.7   | 56.2  | 54.1  | -44.7 | 61.0  | -18.0 |
| PNM_dist_Ch1            | 1.4   | 27.0  | -5.8  | -13.2  | 18.2   | -32.2  | 4.5    | 1.2    | -1.1   | 16.8  | 2.7    | 12.7  | 29.6  | -67.1 | 9.7   | -74.1 |
| PNM_dist_pPAR1          | 5.8   | 27.2  | -0.3  | NA     | 15.8   | -36.3  | -0.2   | -7.5   | -3.8   | 11.0  | 12.4   | 16.5  | NA    | -81.6 | 14.3  | -80.7 |
| Int_Ch1                 | 159.0 | 146.0 | 182.0 | 161.0  | 192.0  | 217.0  | 214.0  | 295.0  | 195.0  | 247.0 | 155.0  | 178.0 | 204.0 | 184.0 | 156.0 | 186.0 |
| Int_NO3                 | 513.0 | 84.7  | 987.0 | 1350.0 | 1120.0 | 2170.0 | 1670.0 | 2510.0 | 2120.0 | 978.0 | 1150.0 | 369.0 | 506.0 | 330.0 | 396.0 | 357.0 |
| Int_NO2                 | 13.2  | 11.1  | 2.4   | 19.0   | 21.3   | 28.1   | 48.4   | 45.7   | 31.7   | 13.2  | 18.3   | 16.4  | 21.5  | 22.4  | 18.1  | 14.1  |
| Int_NH4                 | 36.0  | 2.6   | 7.2   | 3.5    | 3.2    | 2.3    | 0.2    | 3.1    | 1.1    | 1.3   | 0.9    | 0.3   | 0.2   | 0.2   | 0.2   | 0.2   |
| ChlxNO3_In              | 1.0   | 0.9   | 7.6   | 2.4    | 5.3    | 4.4    | 14.9   | 83.6   | 13.4   | 9.6   | 8.2    | 4.7   | 4.0   | 4.0   | 5.5   | 2.2   |
| OxyxNO3_In              | 57.0  | 82.6  | 370.0 | 367.0  | 225.0  | 83.8   | 191.0  | 443.0  | 145.0  | 174.0 | 181.0  | 162.0 | 126.0 | 178.0 | 173.0 | 122.0 |
| Sig_slope               | 0.0   | 0.0   | 0.0   | 0.0    | 0.0    | 0.1    | 0.1    | 0.1    | 0.1    | 0.1   | 0.1    | 0.1   | 0.0   | 0.1   | 0.1   | 0.0   |
| NH4_depth_manual        | 86.0  | 86.0  | 68.0  | 50.0   | 56.0   | 35.0   | 50.0   | 35.0   | 42.0   | 75.0  | 75.0   | 98.0  | 85.0  | 40.0  | 96.0  | 80.0  |
| NH4_max_manual          | 0.0   | 0.1   | 0.1   | 0.0    | 0.1    | 0.1    | 0.0    | 0.3    | 0.0    | 0.0   | 0.0    | 0.0   | 0.0   | 0.0   | 0.0   | 0.0   |
| Sigma_slope             | -70.0 | -35.0 | -25.0 | -42.0  | -24.0  | -14.0  | -12.0  | -12.0  | -9.6   | -9.7  | -11.0  | -12.0 | -29.0 | -19.0 | -15.0 | -42.0 |

23

24 (b)

| PPS Station Characteristics |    |        |       |        |        | Coastal Station Characteristics |                 |   |       |       |        | Offshore Station Characteristics |       |                 |   |        |       |        |        |       |
|-----------------------------|----|--------|-------|--------|--------|---------------------------------|-----------------|---|-------|-------|--------|----------------------------------|-------|-----------------|---|--------|-------|--------|--------|-------|
| column                      | n  | mean   | sd    | min    | max    | se                              | column          | n | mean  | sd    | min    | max                              | se    | column          | n | mean   | sd    | min    | max    | se    |
| Station                     | 16 | 8.50   | 4.76  | 1.00   | 16.00  | 1.19                            | Station         | 4 | 7.50  | 1.29  | 6.00   | 9.00                             | 0.65  | Station         | 4 | 14.50  | 1.29  | 13.00  | 16.00  | 0.65  |
| PNM_max                     | 16 | 0.63   | 0.35  | 0.06   | 1.37   | 0.09                            | PNM_max         | 4 | 1.12  | 0.23  | 0.85   | 1.37                             | 0.11  | PNM_max         | 4 | 0.53   | 0.19  | 0.30   | 0.75   | 0.09  |
| PNM_depth                   | 16 | 73.92  | 21.93 | 38.10  | 103.00 | 5.48                            | PNM_depth       | 4 | 45.58 | 8.09  | 38.10  | 56.90                            | 4.05  | PNM_depth       | 4 | 93.45  | 5.61  | 86.10  | 99.20  | 2.81  |
| PNM_top                     | 15 | 61.75  | 23.41 | 26.80  | 94.20  | 6.05                            | PNM_top         | 4 | 30.32 | 5.71  | 26.80  | 38.80                            | 2.86  | PNM_top         | 4 | 83.67  | 7.09  | 78.80  | 94.20  | 3.54  |
| PNM_sig                     | 16 | 24.16  | 0.41  | 23.20  | 24.70  | 0.10                            | PNM_sig         | 4 | 23.92 | 0.59  | 23.20  | 24.60                            | 0.29  | PNM_sig         | 4 | 24.30  | 0.16  | 24.10  | 24.50  | 0.08  |
| Temp_max                    | 16 | 25.74  | 2.93  | 19.60  | 29.50  | 0.73                            | Temp_max        | 4 | 27.12 | 1.20  | 25.90  | 28.70                            | 0.60  | Temp_max        | 4 | 26.18  | 1.61  | 24.00  | 27.70  | 0.80  |
| TempPNM                     | 16 | 20.42  | 1.60  | 18.00  | 23.70  | 0.40                            | TempPNM         | 4 | 21.40 | 1.87  | 19.20  | 23.70                            | 0.94  | TempPNM         | 4 | 19.70  | 0.81  | 19.20  | 20.90  | 0.41  |
| NH4PNM                      | 16 | 0.05   | 0.07  | 0.00   | 0.27   | 0.02                            | NH4PNM          | 4 | 0.07  | 0.08  | 0.01   | 0.18                             | 0.04  | NH4PNM          | 4 | 0.00   | 0.00  | 0.00   | 0.00   | 0.00  |
| MLD                         | 16 | 31.92  | 19.51 | 14.70  | 75.80  | 4.88                            | MLD             | 4 | 20.08 | 2.74  | 16.30  | 22.80                            | 1.37  | MLD             | 4 | 22.90  | 9.65  | 14.80  | 36.90  | 4.82  |
| Chl_max                     | 16 | 10.51  | 10.52 | 4.53   | 48.50  | 2.63                            | Chl_max         | 4 | 20.93 | 18.47 | 9.91   | 48.50                            | 9.24  | Chl_max         | 4 | 6.52   | 2.03  | 5.04   | 9.49   | 1.02  |
| PARChl                      | 16 | 1.76   | 1.65  | 0.35   | 6.79   | 0.41                            | PARChl          | 4 | 2.19  | 1.27  | 1.47   | 4.10                             | 0.64  | PARChl          | 4 | 3.00   | 2.68  | 0.72   | 6.79   | 1.34  |
| Chl_depth                   | 16 | 64.71  | 16.94 | 34.30  | 90.20  | 4.23                            | Chl_depth       | 4 | 42.45 | 8.37  | 34.30  | 52.40                            | 4.19  | Chl_depth       | 4 | 74.70  | 11.34 | 63.00  | 89.50  | 5.67  |
| Chl_sig                     | 16 | 23.68  | 0.61  | 22.30  | 24.70  | 0.15                            | Chl_sig         | 4 | 23.70 | 0.34  | 23.20  | 23.90                            | 0.17  | Chl_sig         | 4 | 23.42  | 0.48  | 23.00  | 24.10  | 0.24  |
| Nitracline                  | 16 | 79.32  | 25.76 | 38.70  | 118.00 | 6.44                            | Nitracline      | 4 | 49.40 | 10.86 | 38.70  | 61.20                            | 5.43  | Nitracline      | 4 | 107.80 | 10.44 | 93.20  | 118.00 | 5.22  |
| Nitracline_top              | 16 | 66.33  | 24.23 | 29.80  | 102.00 | 6.06                            | Nitracline_top  | 4 | 33.73 | 4.54  | 29.80  | 40.00                            | 2.27  | Nitracline_top  | 4 | 87.62  | 6.14  | 81.50  | 95.00  | 3.07  |
| NitPNM                      | 16 | 9.14   | 5.90  | 1.29   | 20.10  | 1.48                            | NitPNM          | 4 | 16.70 | 3.63  | 12.90  | 20.10                            | 1.82  | NitPNM          | 4 | 5.30   | 2.55  | 2.11   | 7.39   | 1.27  |
| NitChl                      | 15 | 5.25   | 6.20  | -0.15  | 16.70  | 1.60                            | NitChl          | 4 | 10.35 | 4.79  | 4.46   | 15.20                            | 2.39  | NitChl          | 4 | 0.37   | 0.41  | -0.03  | 0.92   | 0.20  |
| ChlPNM                      | 16 | 4.59   | 6.39  | 1.43   | 28.10  | 1.60                            | ChlPNM          | 4 | 9.99  | 12.19 | 1.65   | 28.10                            | 6.09  | ChlPNM          | 4 | 2.60   | 0.40  | 2.02   | 2.95   | 0.20  |
| Oxyceline                   | 14 | 76.26  | 26.93 | 41.40  | 133.00 | 7.20                            | Oxyceline       | 3 | 44.37 | 3.69  | 41.40  | 48.50                            | 2.13  | Oxyceline       | 4 | 84.10  | 9.66  | 70.40  | 93.00  | 4.83  |
| Oxyceline_top               | 16 | 56.21  | 18.08 | 22.00  | 85.00  | 4.52                            | Oxyceline_top   | 4 | 32.45 | 8.18  | 22.00  | 42.00                            | 4.09  | Oxyceline_top   | 4 | 68.75  | 11.81 | 60.00  | 85.00  | 5.91  |
| OxyPNM                      | 16 | 114.49 | 59.55 | 31.50  | 227.00 | 14.89                           | OxyPNM          | 4 | 75.22 | 51.09 | 31.50  | 149.00                           | 25.55 | OxyPNM          | 4 | 108.45 | 43.76 | 63.20  | 164.00 | 21.88 |
| pPAR1                       | 14 | 66.21  | 16.01 | 38.30  | 86.40  | 4.28                            | pPAR1           | 4 | 47.50 | 7.80  | 38.30  | 57.10                            | 3.90  | pPAR1           | 3 | 84.10  | 0.80  | 83.30  | 84.90  | 0.46  |
| PARPNM                      | 16 | 0.97   | 1.06  | 0.12   | 3.78   | 0.27                            | PARPNM          | 4 | 1.64  | 1.08  | 0.68   | 3.12                             | 0.54  | PARPNM          | 4 | 0.48   | 0.23  | 0.31   | 0.81   | 0.12  |
| PNM_dist_Nittop             | 16 | -5.19  | 32.90 | -87.70 | 22.90  | 8.23                            | PNM_dist_Nittop | 4 | 1.68  | 21.98 | -29.10 | 22.90                            | 10.99 | PNM_dist_Nittop | 4 | -35.27 | 56.95 | -87.70 | 16.90  | 28.48 |
| PNM_dist_Oxytop             | 14 | 25.49  | 31.50 | -44.70 | 61.00  | 8.42                            | PNM_dist_Oxytop | 3 | 18.71 | 12.11 | 5.24   | 28.70                            | 6.99  | PNM_dist_Oxytop | 4 | 13.10  | 52.55 | -44.70 | 61.00  | 26.27 |

25

26 (c)

27

|                                             | Pearsons R                                  |                  | P-value                                     |                  |
|---------------------------------------------|---------------------------------------------|------------------|---------------------------------------------|------------------|
|                                             | NO <sub>2</sub> <sup>-</sup> <sub>max</sub> | Z <sub>NO2</sub> | NO <sub>2</sub> <sup>-</sup> <sub>max</sub> | Z <sub>NO2</sub> |
| NO <sub>2</sub> <sup>-</sup> <sub>max</sub> | 1.000                                       | -0.521           | NA                                          | 0.03871          |
| Z <sub>NO2</sub>                            | -0.521                                      | 1.000            | 0.03871                                     | NA               |
| Chl <sub>max</sub>                          | 0.527                                       | -0.577           | 0.03599                                     | 0.01923          |
| NH <sub>4</sub> <sup>+</sup> <sub>max</sub> | 0.312                                       | -0.494           | 0.23958                                     | 0.05205          |
| Z <sub>chl</sub>                            | -0.624                                      | 0.836            | 0.00985                                     | 0.00005          |
| Z <sub>NH4</sub>                            | -0.505                                      | 0.787            | 0.04612                                     | 0.00030          |
| Z <sub>nit</sub>                            | -0.549                                      | 0.974            | 0.02771                                     | 0.00000          |
| Z <sub>mnit</sub>                           | -0.583                                      | 0.904            | 0.01773                                     | 0.00000          |
| Z <sub>oxy</sub>                            | -0.575                                      | 0.868            | 0.01978                                     | 0.00001          |
| Z <sub>moxy</sub>                           | -0.520                                      | 0.716            | 0.05649                                     | 0.00398          |
| Z <sub>PAR</sub>                            | -0.593                                      | 0.931            | 0.02555                                     | 0.00000          |
| Chl <sub>pnm</sub>                          | 0.502                                       | -0.478           | 0.04732                                     | 0.06117          |
| NH <sub>4</sub> <sup>+</sup> <sub>pnm</sub> | -0.055                                      | -0.411           | 0.83873                                     | 0.11371          |
| NO <sub>3</sub> <sup>-</sup> <sub>pnm</sub> | 0.733                                       | -0.623           | 0.00122                                     | 0.00994          |
| T <sub>pnm</sub>                            | 0.552                                       | -0.446           | 0.02669                                     | 0.08314          |
| D <sub>pnm</sub>                            | -0.484                                      | 0.395            | 0.05762                                     | 0.13024          |
| PAR <sub>pnm</sub>                          | 0.253                                       | -0.680           | 0.34348                                     | 0.00372          |
| O <sub>2pnm</sub>                           | -0.578                                      | 0.001            | 0.01907                                     | 0.99595          |
| BV <sub>pnm</sub>                           | 0.664                                       | -0.183           | 0.00507                                     | 0.49852          |
| NH <sub>4</sub> <sup>+</sup> <sub>Int</sub> | 0.532                                       | -0.516           | 0.03379                                     | 0.04074          |
| NO <sub>2</sub> <sup>-</sup> <sub>Int</sub> | 0.698                                       | -0.941           | 0.00263                                     | 0.00000          |
| NO <sub>3</sub> <sup>-</sup> <sub>Int</sub> | 0.853                                       | -0.604           | 0.00003                                     | 0.01325          |
| Chl <sub>Int</sub>                          | -0.337                                      | -0.114           | 0.20223                                     | 0.67487          |

29 **Figure S1. Regressions with CTD data included** – (a) Concentration of the nitrite maxima regressed against water  
 30 column features and (b) depth of the nitrite maxima regressed against depth-related water column features.

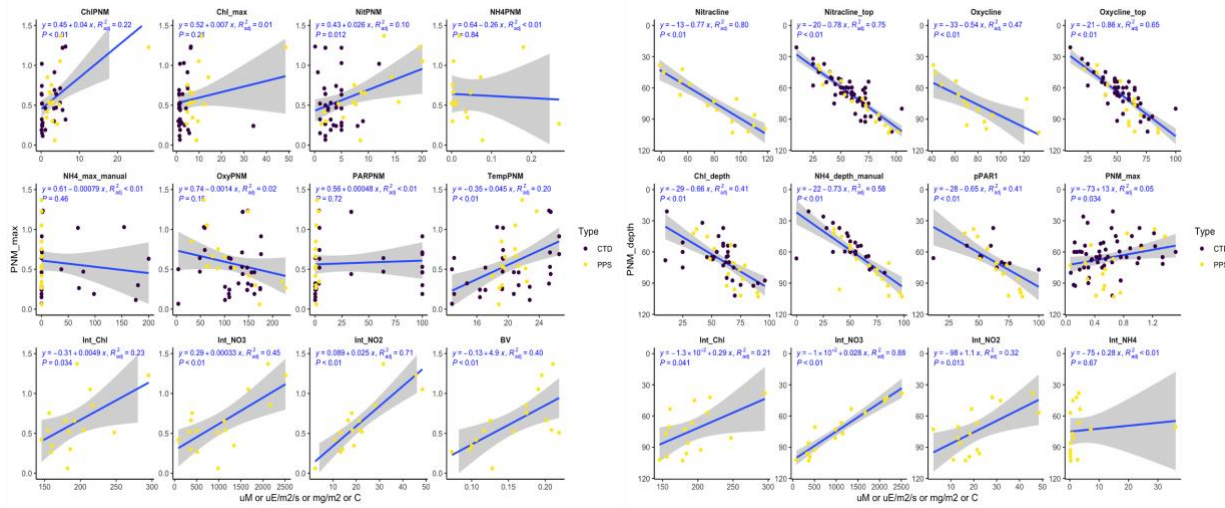

31  
 32 **Figure S2. Regression of depth of nitrite maxima** – This plot shows regressions of depth vs features of the water  
 33 column that are not limited to depth-related features (eg. depth of nitrite maxima vs concentration of chlorophyll  
 34 at the nitrite maxima).

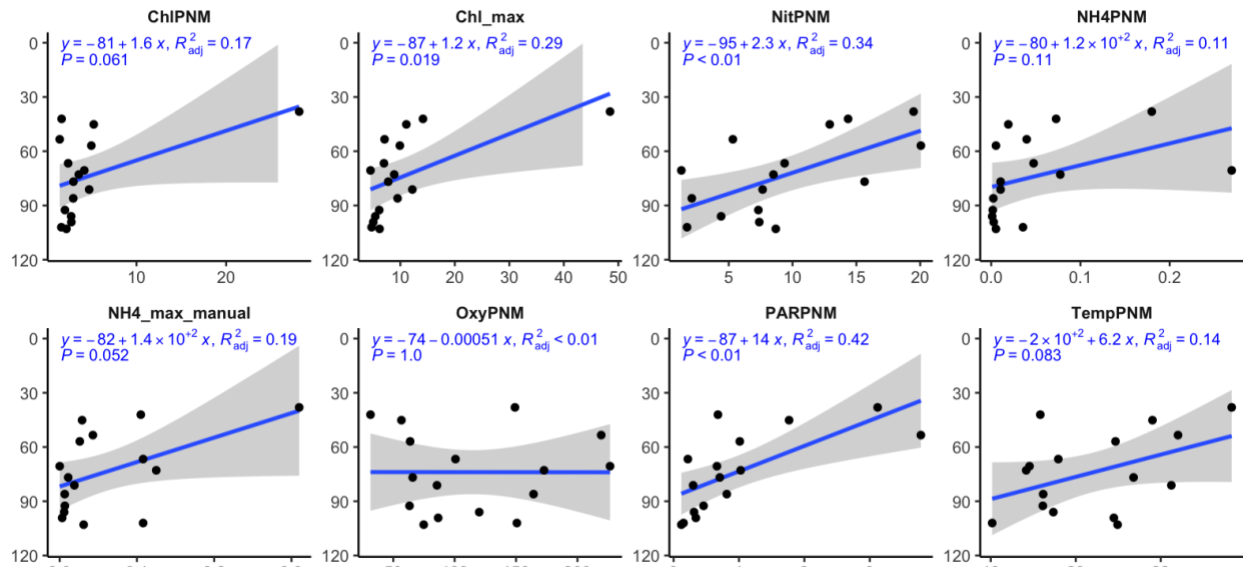

35  
 36 **Multiple Linear Regression Analysis - “Full” Variable Model**

37 **All-Station**

38 This model analysis used all the available variables to predict nitrite concentrations in the ETNP. When trained  
 39 using all the stations, multiple linear regression optimization across all stations resulted in a combination of 10  
 40 variables that were able to predict 66% of the total variance in nitrite concentration. The final optimized model  
 41 included 3 primary variables (chlorophyll, ammonium and oxygen) and 7 interaction terms (Table S3). Based on  
 42 relative importance calculations, the temperature-density interaction term contributed the largest amount to the total  
 43 variance in nitrite explained by the model (19.8%). The top 3 variables by relative importance all involved



44 temperature, and in sum contributed 32.3% to the total model  $R^2$ . Eight out of ten of the variables selected in this  
45 model contributed less than 6% each to total model  $R^2$  (Table S3). The predicted vs. observed nitrite slope was less  
46 than 1, meaning small nitrite maxima (<~70 nM) were overpredicted and larger nitrite maxima tended to be  
47 underpredicted.

#### 48 **Regional Station Subsets – Coastal and Offshore**

49 Taking subsets of station data to make separate coastal and offshore ‘full’ models allowed for better explanatory  
50 power compared to grouping all of the stations together in a single MLR model (Fig. S3). Model optimization  
51 selected different sets of variables to explain the nitrite concentrations in each model, but nitrate was critical across  
52 all three models, aligning with results from the simple linear regression analyses, where nitrate is important for  
53 explaining both depth of the nitrite maximum and the concentration of the nitrite maximum. While the maximum  
54 nitrite concentration was not predicted well by these models, the mean error for the depth of the nitrite maximum  
55 was less than 4 m for all three ‘full’ models. However, the predicted depth of the nitrite maximum at individual  
56 stations could be more significantly erroneous (Table S4).

57 For the coastal ‘full’ model the optimization resulted in 10 variables and was able to predict 77% of the total  
58 variance in nitrite across the coastal stations. The predicted versus observed slope was less than 1, suggesting slight  
59 overprediction of smaller nitrite maxima (<330 nM) and slight underprediction of larger nitrite maxima. The most  
60 important variable was the nitrate-oxygen interaction term, which explained 17% of the total model variance.  
61 Although nitrate was not included as a primary variable, it was involved in three out of seven of the interaction  
62 terms, and in sum these nitrate interaction terms contributed to nearly half of the total model  $R^2$  (33.8%). The  
63 coastal ‘full’ model was able to predict the depth of the nitrite maxima well at the coastal stations, with an average  
64 underprediction in depth of only 2.9 m (Fig. S3, Table S4). The maximum nitrite concentrations at coastal stations  
65 were also accurately predicted by the coastal model, with an average underprediction of only 121 nM. The largest  
66 observed nitrite maximum (Station 8) was slightly overpredicted by the coastal model, while the nitrite maximum at  
67 Stations 6 and 7 were well predicted (Fig. S3, green). The inability of this model to be applied across all stations is  
68 reflected again in the poor correlation between observed and predicted nitrite concentration ( $R^2=0.013$ ).

69 For the offshore ‘full’ model, 12 variables were included after the optimization process and the final model  
70 explained 79% of the overall variance in nitrite across offshore stations. The predicted vs observed slope was less  
71 than 1, again suggesting slight overprediction of smaller nitrite maxima (<~150 nM) and slight underprediction of  
72 larger sized nitrite maxima. The two most important variables in the offshore model were the oxygen-chlorophyll  
73 and density-chlorophyll interaction terms, which each explained 9.4% of the total nitrite variance (Table S3c).  
74 Chlorophyll appeared to be an important parameter in this model, being included as a primary variable and in 4  
75 interaction terms for a total contribution of 38% to total model  $R^2$ . Predicted nitrite profiles accurately captured the  
76 concentration of the nitrite maxima at offshore stations 13 and 16, while offshore stations 14 and 15 were both  
77 slightly underpredicted. The accuracy of the offshore ‘full’ model applied to all stations was much more variable,  
78 with a mix of fairly accurate (stations 5 and 12), overprediction (stations 3, 4, 6, 7, 8, 10, 11) and underprediction  
79 (stations 1 and 2) (Fig. S3).

80 **Table S3. Coefficients from ‘Full’ MLR model** – Optimized multiple linear regression coefficients from each  
81 ‘full’ model and relative importance values (all-stations, coastal, offshore).

| Full MLR Coefficients - All Stations |             |                    | Full MLR Coefficients - Coastal |             |                    | Full MLR Coefficients - Offshore |             |                    |
|--------------------------------------|-------------|--------------------|---------------------------------|-------------|--------------------|----------------------------------|-------------|--------------------|
| Variable                             | Coefficient | Percent Importance | Variable                        | Coefficient | Percent Importance | Variable                         | Coefficient | Percent Importance |
| (Intercept)                          | -10.798     |                    | (Intercept)                     | -38.861     |                    | (Intercept)                      | -2.5289     |                    |
| Temperature:SigmaT                   | 0.0175      | 19.8               | Nitrate:Oxygen                  | 0.0078      | 17.7               | Oxygen:Chlorophyll               | -0.0027     | 9.4                |
| Ammonium:Temperature                 | 0.0245      | 6.7                | Oxygen:pPAR                     | -0.0043     | 10.4               | SigmaT:Chlorophyll               | 0.5121      | 9.4                |
| Oxygen:Temperature                   | -0.0052     | 5.8                | pPAR                            | 0.9702      | 10                 | Nitrate:Temperature              | 0.1299      | 9.1                |
| SigmaT:Chlorophyll                   | 0.9121      | 5.7                | Nitrate:Chlorophyll             | 0.0450      | 9.3                | Chlorophyll                      | -13.565     | 8.6                |
| Chlorophyll                          | -28.526     | 5.5                | Nitrate:Ammonium                | 0.2290      | 6.8                | Nitrate                          | -12.572     | 7.3                |
| Nitrate:Temperature                  | 0.0063      | 5.1                | Ammonium:pPAR                   | 0.0147      | 6.8                | Nitrate:SigmaT                   | 0.4168      | 6.9                |
| Temperature:Chlorophyll              | 0.3126      | 4.9                | Oxygen:Chlorophyll              | -0.0018     | 4.8                | Ammonium:Oxygen                  | -0.0002     | 5.4                |
| Ammonium                             | -0.6865     | 4.5                | Ammonium                        | -0.5882     | 4.3                | Nitrate:Ammonium                 | 0.0141      | 5.4                |
| Oxygen                               | 0.3892      | 4.4                | SigmaT                          | 1.5081      | 4.1                | Temperature:Chlorophyll          | 0.0898      | 5.3                |
| Oxygen:SigmaT                        | -0.0118     | 4.1                | pPAR:Chlorophyll                | 0.0371      | 2.7                | Ammonium:Chlorophyll             | -0.0029     | 5.3                |
|                                      |             |                    |                                 |             |                    | Ammonium:pPAR                    | -0.0003     | 3.2                |
|                                      |             |                    |                                 |             |                    | Ammonium:SigmaT                  | -0.0009     | 0.9                |

82

83 **Figure S3.** Nitrite profile predictions from three ‘full’ model multiple linear regression analyses trained using all  
 84 station (blue), trained on coastal subset of station (green) and trained using an offshore subset of stations (dark blue).  
 85 Subsets of stations using in the coastal and offshore model are outlined in green and dark blue, respectively.  
 86 Observed nitrite concentrations are plotted in magenta. Offshore model: Station 8 and 9 are beyond the x-axis. All-  
 87 station model: Station 8 is beyond the x-axis.

88

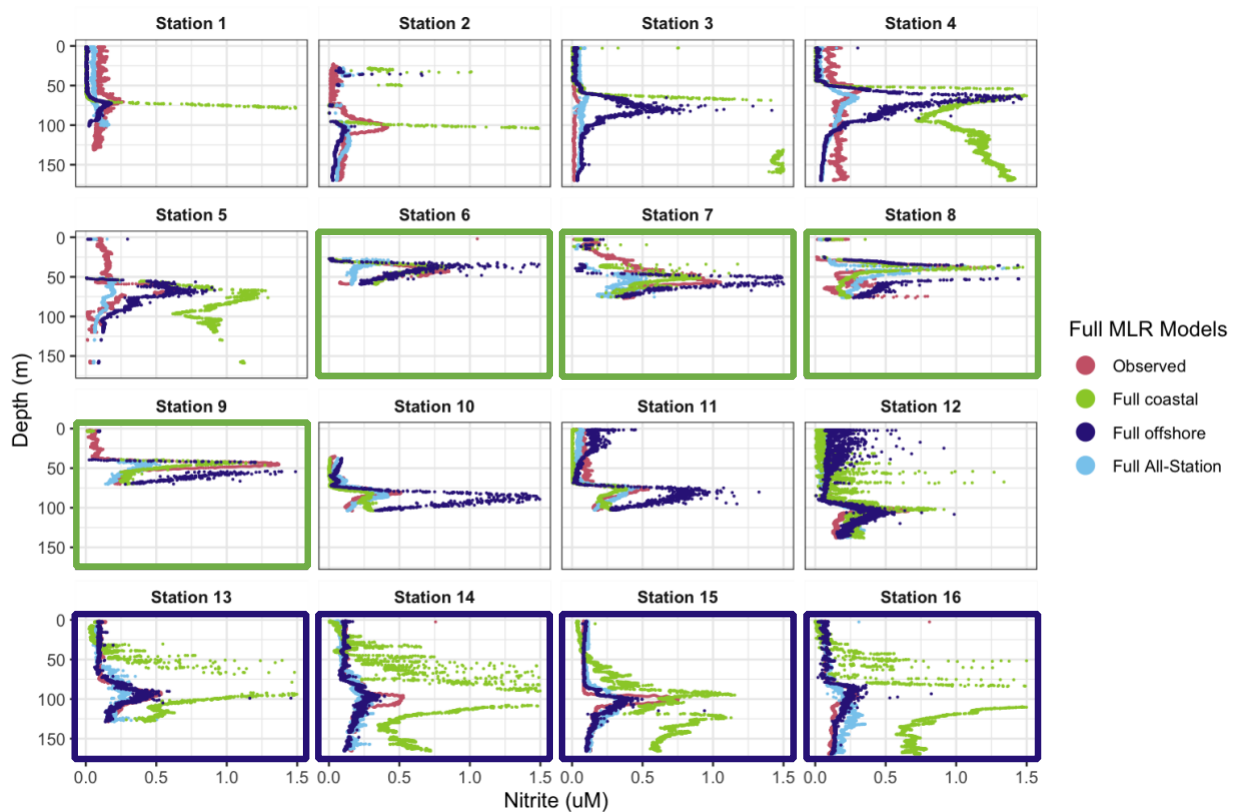

89

90 **Table S4. Error values for ‘Full’ MLR** – Observed nitrite maxima and corresponding depth are listed for each  
 91 station during the 2016 cruise (PPS data). The depth error and nitrite maxima size errors are listed for each of the  
 92 three models. Negative error values are underestimates of the observed feature, and positive errors are overestimates  
 93 of the observed nitrite maximum. The stations used for training the coastal and offshore models are boxed (coastal –  
 94 6,7,8,9 and offshore – 13,14,15,16). Summary of the observed nitrite maxima across the region (means and standard





121 The nitrate variables were involved in explaining similar amounts of the nitrite variance in both models (coastal and  
122 offshore, 40.8% and 38.8%). Nitrate as a single variable also explained a similar portion of the total model variance  
123 in both the coastal and offshore models (12.2%, 10.2% respectively). The coefficients for nitrate variables have the  
124 same sign in both models, with nitrate having a negative coefficient and the two nitrate interaction terms having  
125 positive coefficients. Overall, the negative nitrate coefficients act to decrease predicted nitrite below the nitrite  
126 maxima where nitrate increases towards  $\sim 25 \mu\text{M}$ . The slightly more negative coefficient in the coastal model is  
127 counteracted by the slightly higher concentrations of nitrate seen at coastal nitrite maxima. The oxygen and pPAR  
128 coefficients for both models are also negative, and act to decrease predicted nitrite at the depths above the nitrite  
129 maximum. The interaction terms containing nitrate in both models have positive coefficient values, adding nitrite to  
130 depths near the PNM where nitrate, oxygen and chlorophyll are all present together. In both 'core' models, the  
131 interaction term between nitrate and chlorophyll is an important variable ( $>10\%$   $R^2$  in both).

132 The chlorophyll variables are the only coefficients that differ in sign between the two models, with the coastal  
133 chlorophyll coefficient being negative and the offshore chlorophyll coefficient being positive. The quadratic term for  
134 chlorophyll has a negative sign for both models, meaning the presence of a chlorophyll maximum decreases nitrite  
135 predictions strongly just above the nitrite maximum (perhaps driven by nitrite uptake) and shifts the nitrite peak  
136 towards the downslope of the chlorophyll maximum. The single chlorophyll term in the coastal model is also  
137 negative and reduces nitrite predictions in direct proportion to the size of the chlorophyll peak. In contrast, the  
138 positive single chlorophyll term in the offshore model means that, opposing the quadratic term, this variable adds  
139 nitrite at depths across the chlorophyll maximum. Additionally, the single chlorophyll term in the offshore model is  
140 much larger in absolute magnitude than the coastal term, which likely explains the poor performance of the offshore  
141 core model at coastal stations where chlorophyll concentrations are often larger (Fig. 7).

142 **Table S5. Error values for 'Core' MLR** – Observed nitrite maxima and corresponding depth are listed for each  
143 station during the 2016 cruise (PPS data). The depth error and nitrite maxima size errors are listed for each of the  
144 two core models. Negative error values are underestimates of the observed feature, and positive errors are  
145 overestimates of the observed nitrite maximum. The stations used for training the coastal and offshore models are  
146 boxed (coastal – 6,7,8,9 and offshore – 13,14,15,16). Summary of the observed nitrite maxima across the region  
147 (means and standard errors), and summaries for the errors in each model are listed at the bottom of the table.  
148 Summaries (mean and standard error) of the errors for only the subset of training stations for each model are also  
149 included.

Core Variable MLR

| Station                | Coastal Errors      |                             |           |           | Offshore Errors |           |       |
|------------------------|---------------------|-----------------------------|-----------|-----------|-----------------|-----------|-------|
|                        | Nitrite Maxima (uM) | Depth of Nitrite Maxima (m) | Depth (m) | Size (uM) | Depth (m)       | Size (uM) |       |
| 1                      | 0.27                | 70.61                       | 23.41     | 0.29      | 17.42           |           | -0.09 |
| 2                      | 0.42                | 102                         | 4.96      | 0.1       | 4.96            |           | -0.11 |
| 3                      | 0.06                | 72.88                       | 5.8       | 0.57      | 12.12           |           | 0.25  |
| 4                      | 0.35                | 53.4                        | 6.77      | 0.36      | 18.6            |           | -0.03 |
| 5                      | 0.66                | 66.67                       | 0.44      | -0.14     | -1.67           |           | -0.28 |
| 6                      | 0.85                | 42.1                        | -5.11     | -0.34     | -4.1            |           | -0.05 |
| 7                      | 1.05                | 56.89                       | -4.52     | -0.47     | 6.11            |           | -0.6  |
| 8                      | 1.23                | 38.08                       | 1.65      | 0.81      | 13.92           |           | -0.92 |
| 9                      | 1.37                | 45.15                       | 1.09      | -0.83     | 7.85            |           | -0.97 |
| 10                     | 0.51                | 81.18                       | 2.27      | 0.01      | 6.82            |           | -0.06 |
| 11                     | 0.54                | 76.84                       | -1.87     | -0.03     | -2.73           |           | -0.14 |
| 12                     | 0.66                | 103                         | -0.61     | -0.15     | -2.95           |           | -0.17 |
| 13                     | 0.53                | 92.53                       | -4.98     | 0.05      | -5.53           |           | 0.18  |
| 14                     | 0.52                | 96.01                       | 0.59      | -0.02     | -0.01           |           | -0.19 |
| 15                     | 0.75                | 99.2                        | 0.04      | -0.25     | 2.8             |           | -0.35 |
| 16                     | 0.3                 | 86.06                       | 7.34      | 0.23      | 13.94           |           | 0.04  |
| Mean                   | 0.63                | 73.91                       | 2.33      | 0.01      | 5.47            |           | -0.22 |
| Std Error              | 0.1                 | 5.5                         | 1.7       | 0.1       | 2.0             |           | 0.1   |
| Coastal Stations Only  |                     |                             |           |           |                 |           |       |
| Offshore Stations Only |                     |                             |           |           |                 |           |       |
| -1.72 -0.21 2.80 -0.08 |                     |                             |           |           |                 |           |       |
| 1.79 0.35 4.10 0.12    |                     |                             |           |           |                 |           |       |

150

151

152

153 **Figure S4. Rates vs nitrite concentration** – None of the four rate measurements (ammonia oxidation, nitrite  
 154 oxidation, nitrate reduction or nitrite uptake) or net nitrite calculations (NetNit, NetPhy, NetNO<sub>2</sub>) correlate with  
 155 observed nitrite concentrations at the depth of measurement.

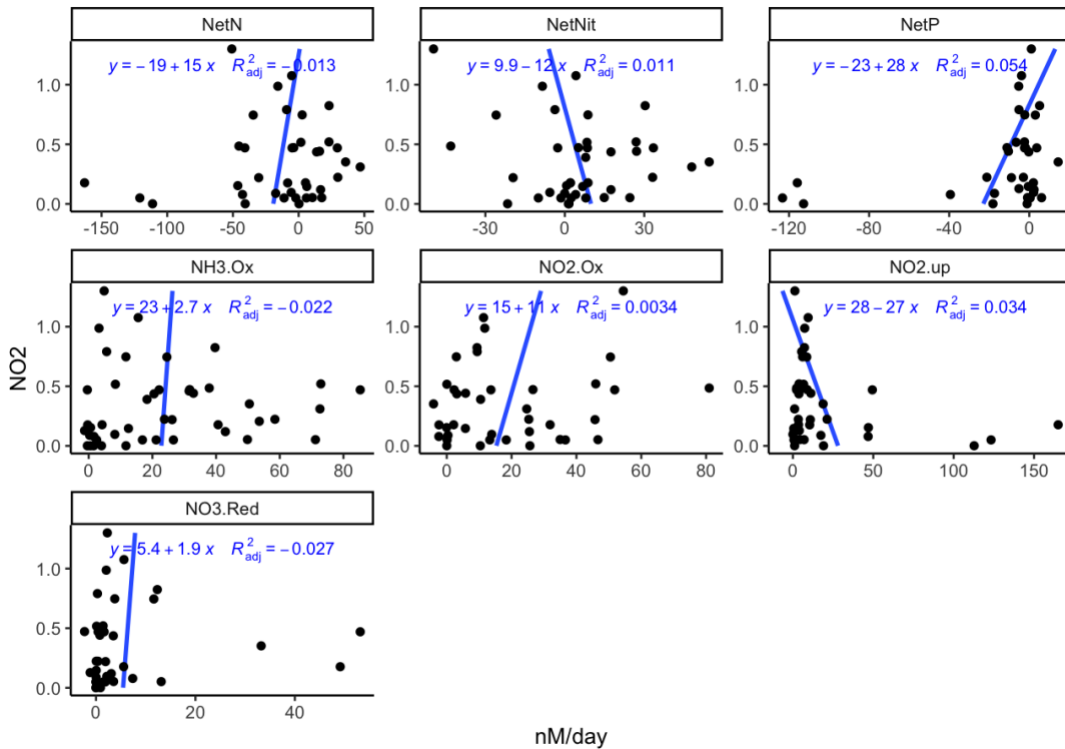

156

157 **Figure S5. Maximum Rates vs PNM size** – The maximum measured rate at each station was regressed against the  
 158 size of the PNM for that station, and no correlations were seen. Because only 3-4 depths were sampled for rate  
 159 measurements per station, there is a possibility that we missed the depth of the real maximum rate and/or the real  
 160 nitrite maxima.

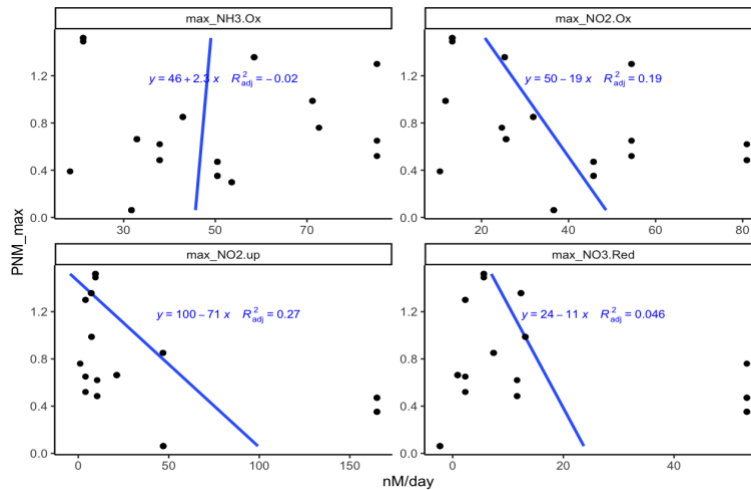

161

162 **Figure S6. Residence Time** – residence time can be calculated from net influx or outflux to the system assuming  
 163 steady-state. We calculated residence time using net production of nitrite (a), production from ammonia oxidation  
 164 (b) and using net consumption (c). Mean residence times are 30.8, 43.4, 20.3 days, respectively. Potential formation  
 165 time is calculated using the NetNO<sub>2</sub> production rates and observed nitrite concentrations (d). Mean formation time  
 166 is 4.4 days.

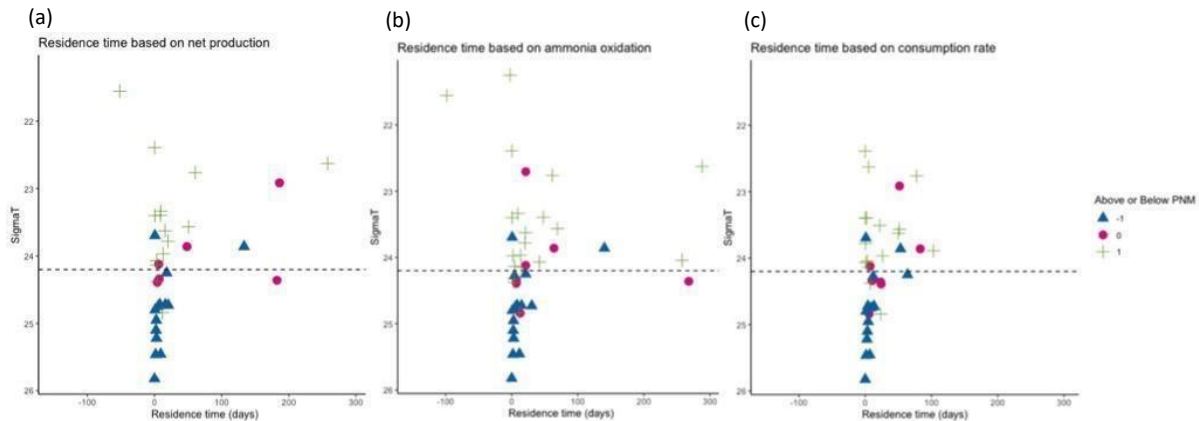

167

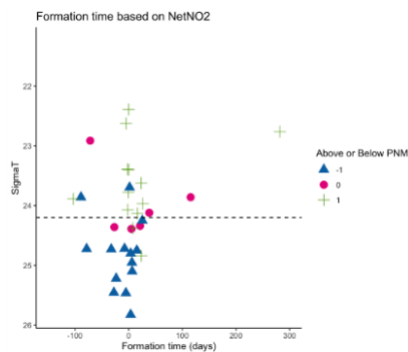

168

169

170 **Figure S7.** DIN concentration versus microbial rates did not show a linear substrate dependence. However, most of  
171 the highest ammonia oxidation and nitrite uptake rates fell in the lower range of substrate concentrations. At low  
172 DIN there is still high variability in the magnitude of the resulting rate, suggesting DIN-limitation is not the only  
173 controlling factor.

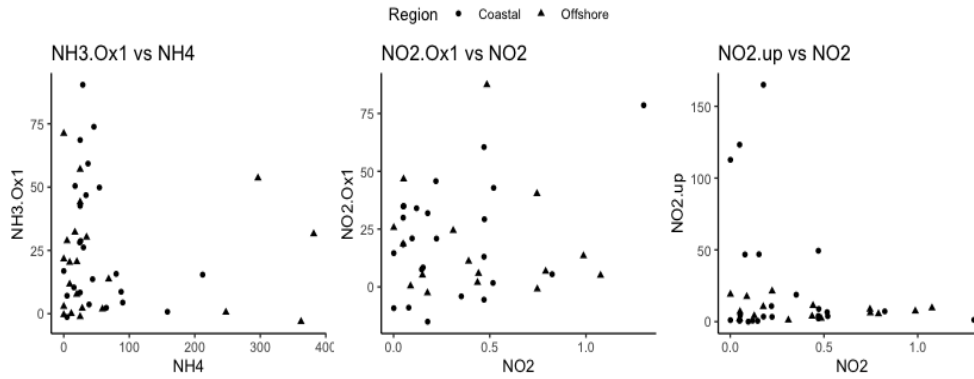

174

175

176 **Figure S8.** The surface current plot for April 07-11 2016 (5 day average from OSCAR; Earth & Space Research,  
177 below) showed fastest movement of surface waters near the southern coastal stations (6,7,8,9), which is similar to  
178 the averaged March surface currents by Fiedler and Lavín (2017).

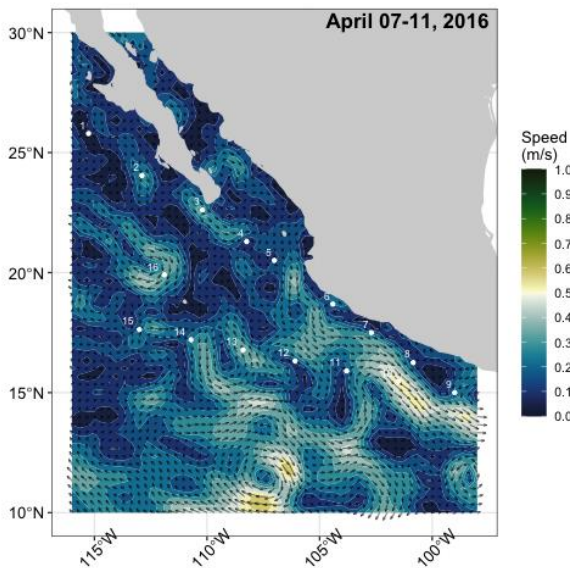

179

180 **Figure S9.** Density profiles for the 2016 PPS dataset across 16 station in the ETNP. Linear fits were applied  
 181 through the SigmaT data centered at the depth of the nitrite maxima and spanning 16 m total.

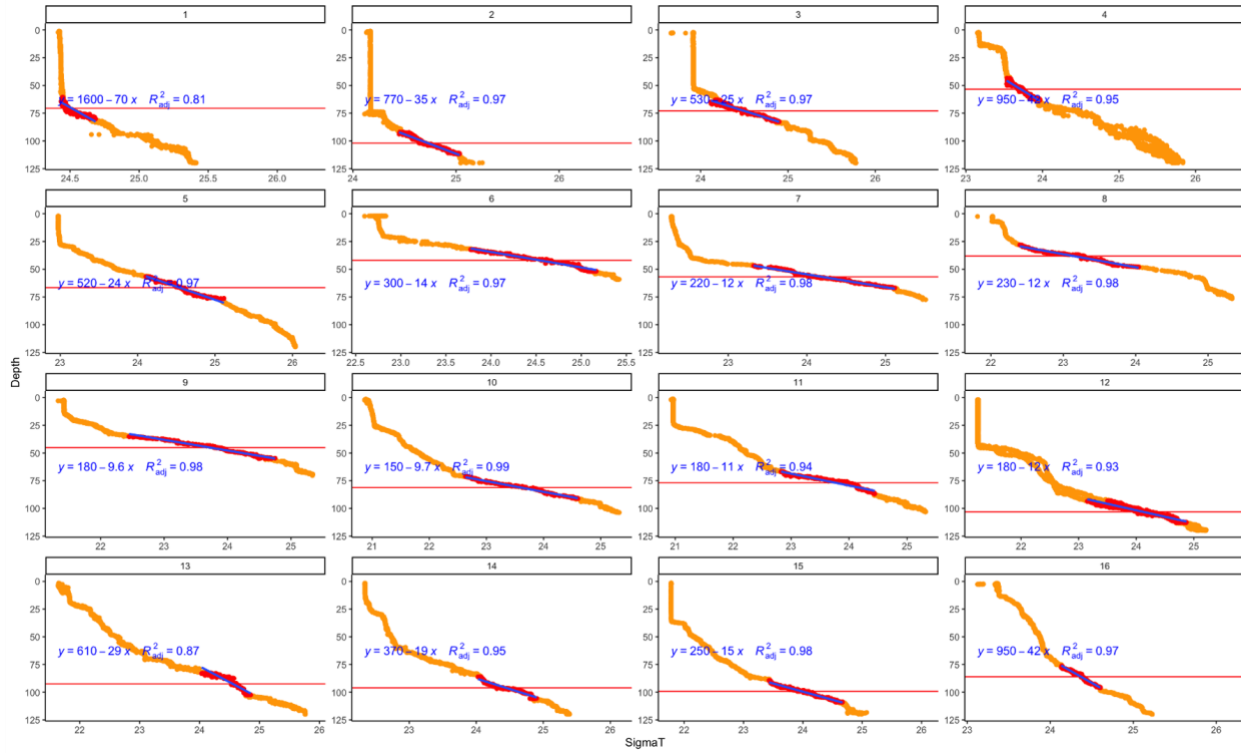

182
