# Supplementary material for: Nitrite Cycling in the Primary Nitrite Maxima of the Eastern Tropical North Pacific
Source: Copernicus journal article supplement (doi:10.5194/bg-2022-137), 2022-06-27

Figures in Reply on RC1

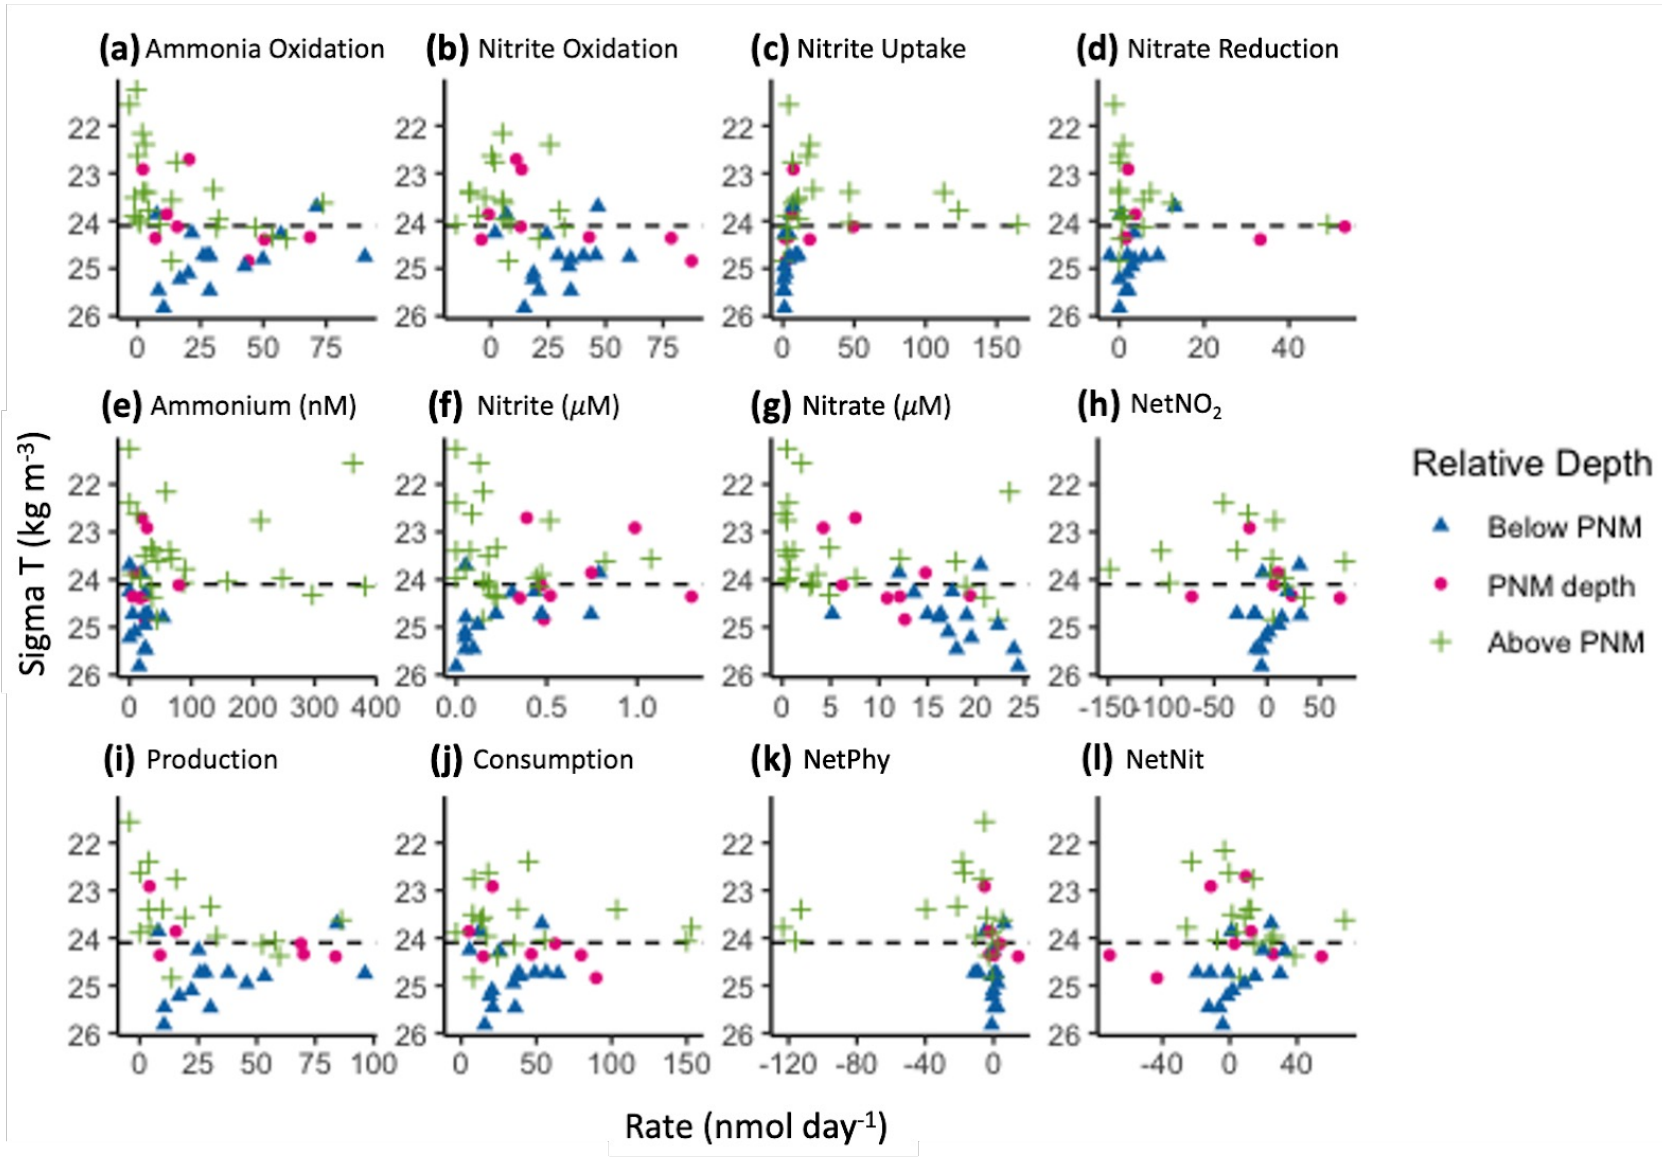

Region • Coastal ▲ Offshore

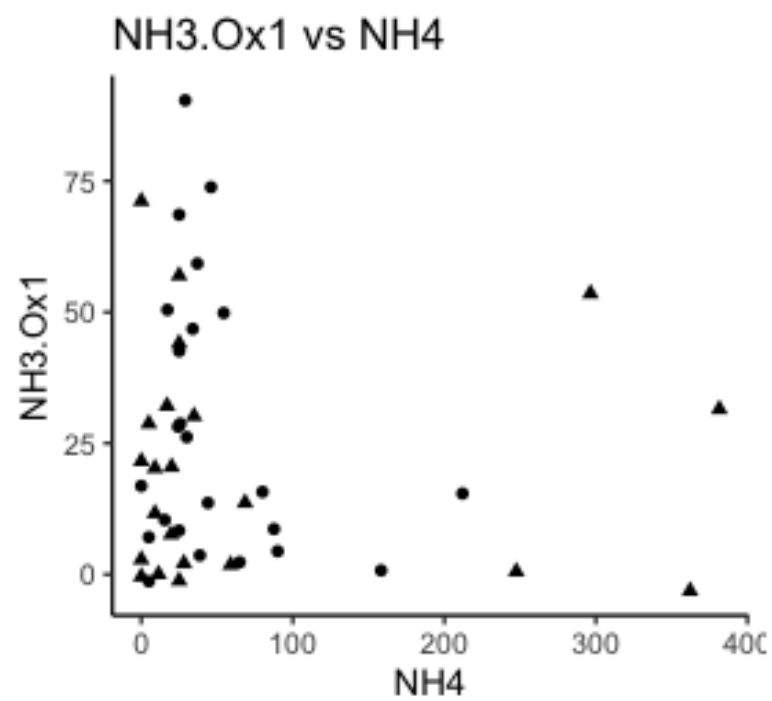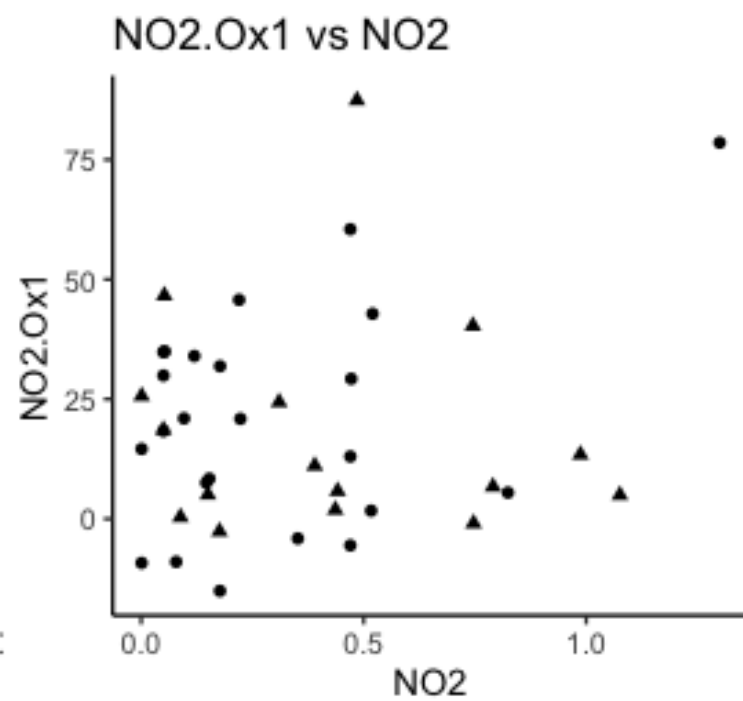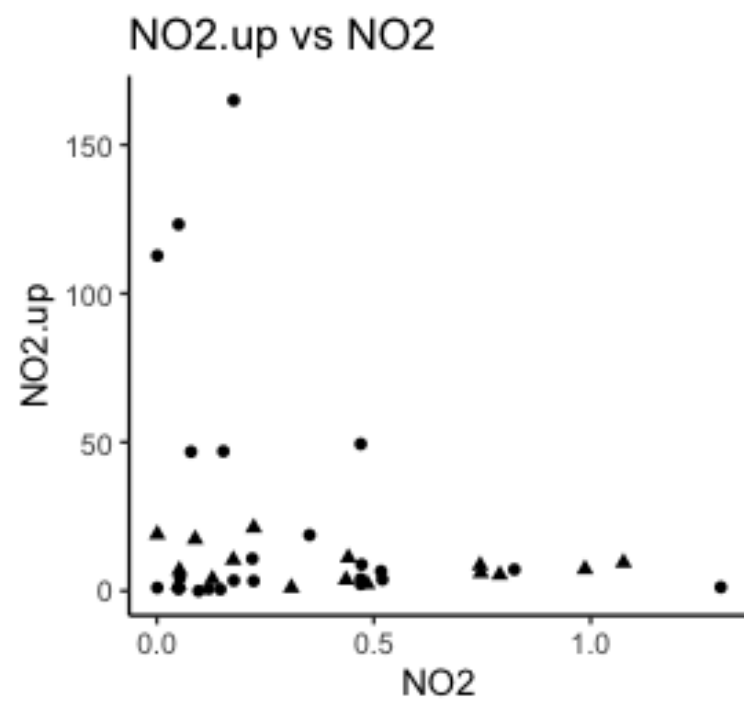

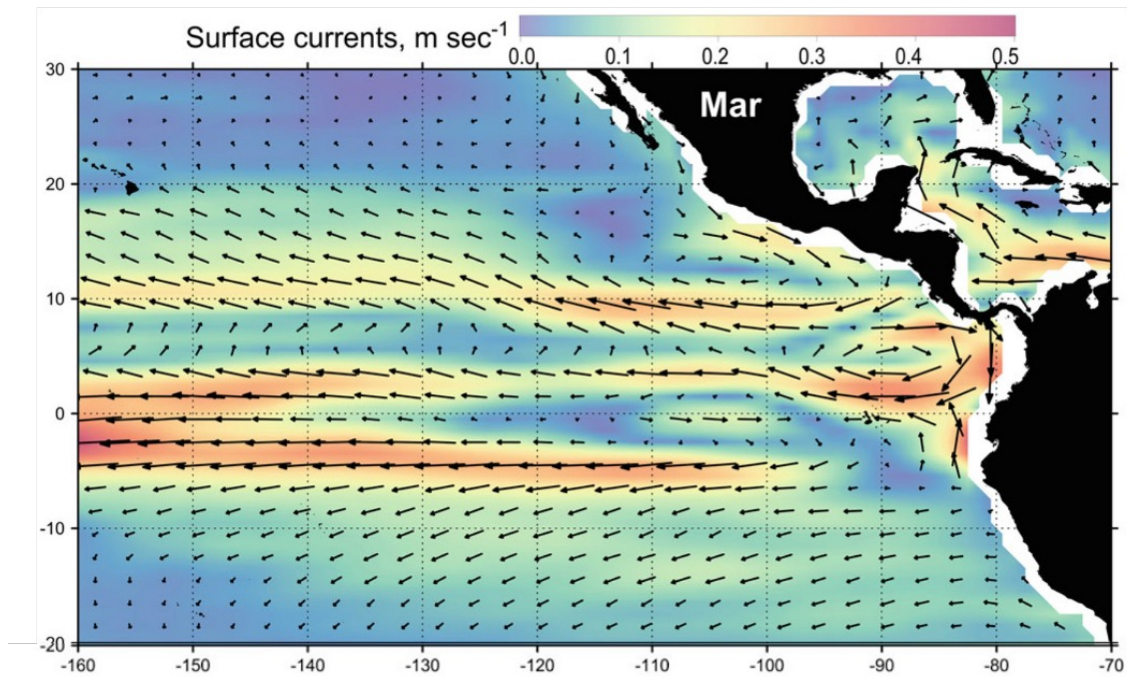

**Fig. 3.12** Surface currents 1993–2010, March and September climatologies (NASA's ocean surface current analysis-real time project, OSCAR, <http://www.oscar.noaa.gov/>)

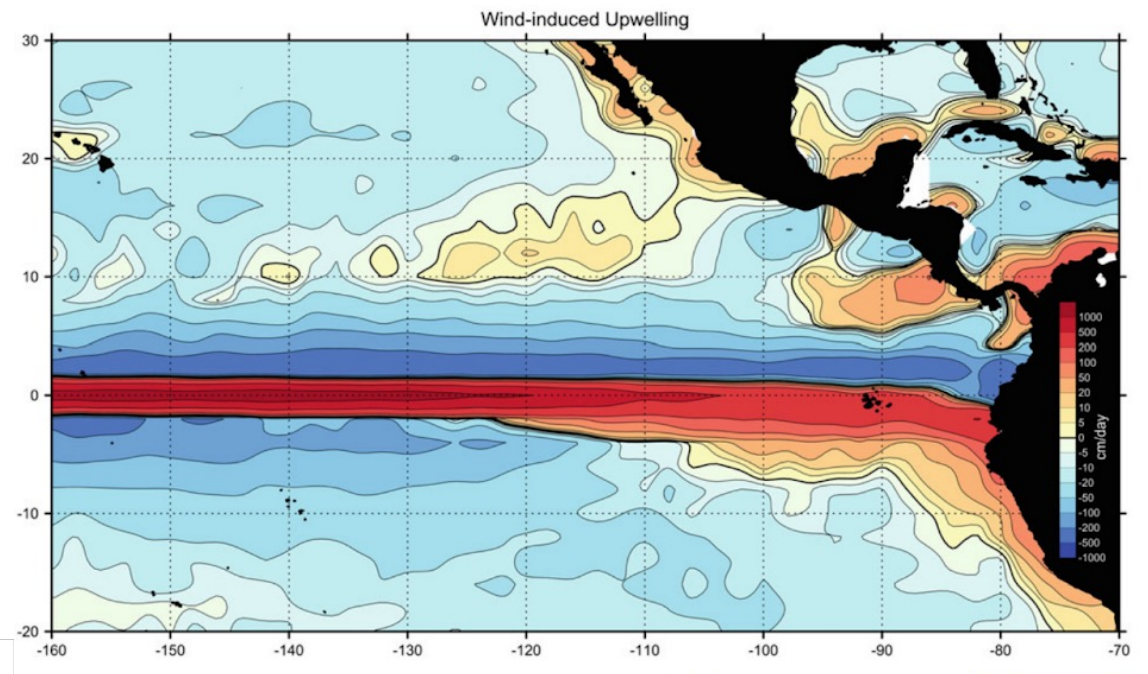

**fig. 3.16** Annual mean wind-driven upwelling,  $\text{cm d}^{-1}$ , 1950–1997 (Xie and Hsieh 1995). Data provided by Liusen Xie, <http://www.ocgy.ubc.ca/projects/clim.pred/Upwell/>

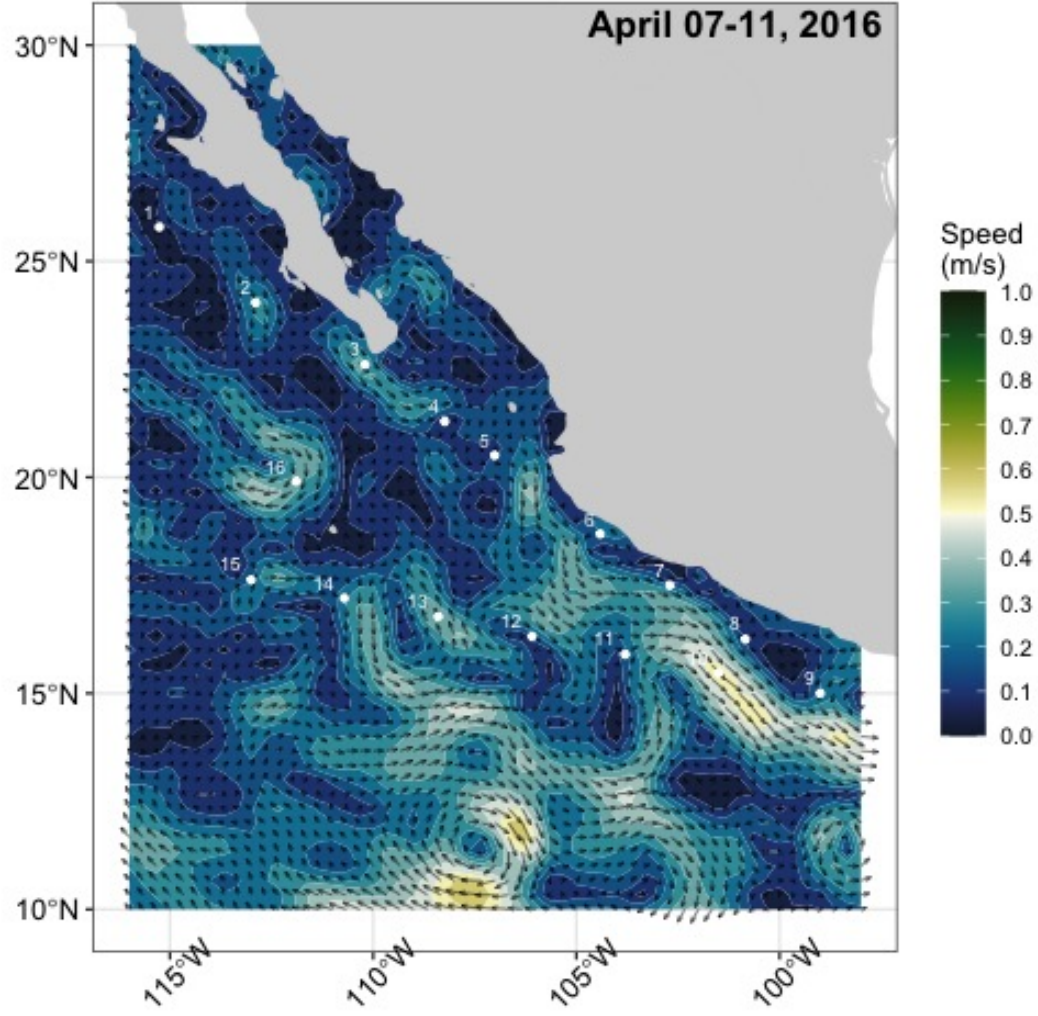

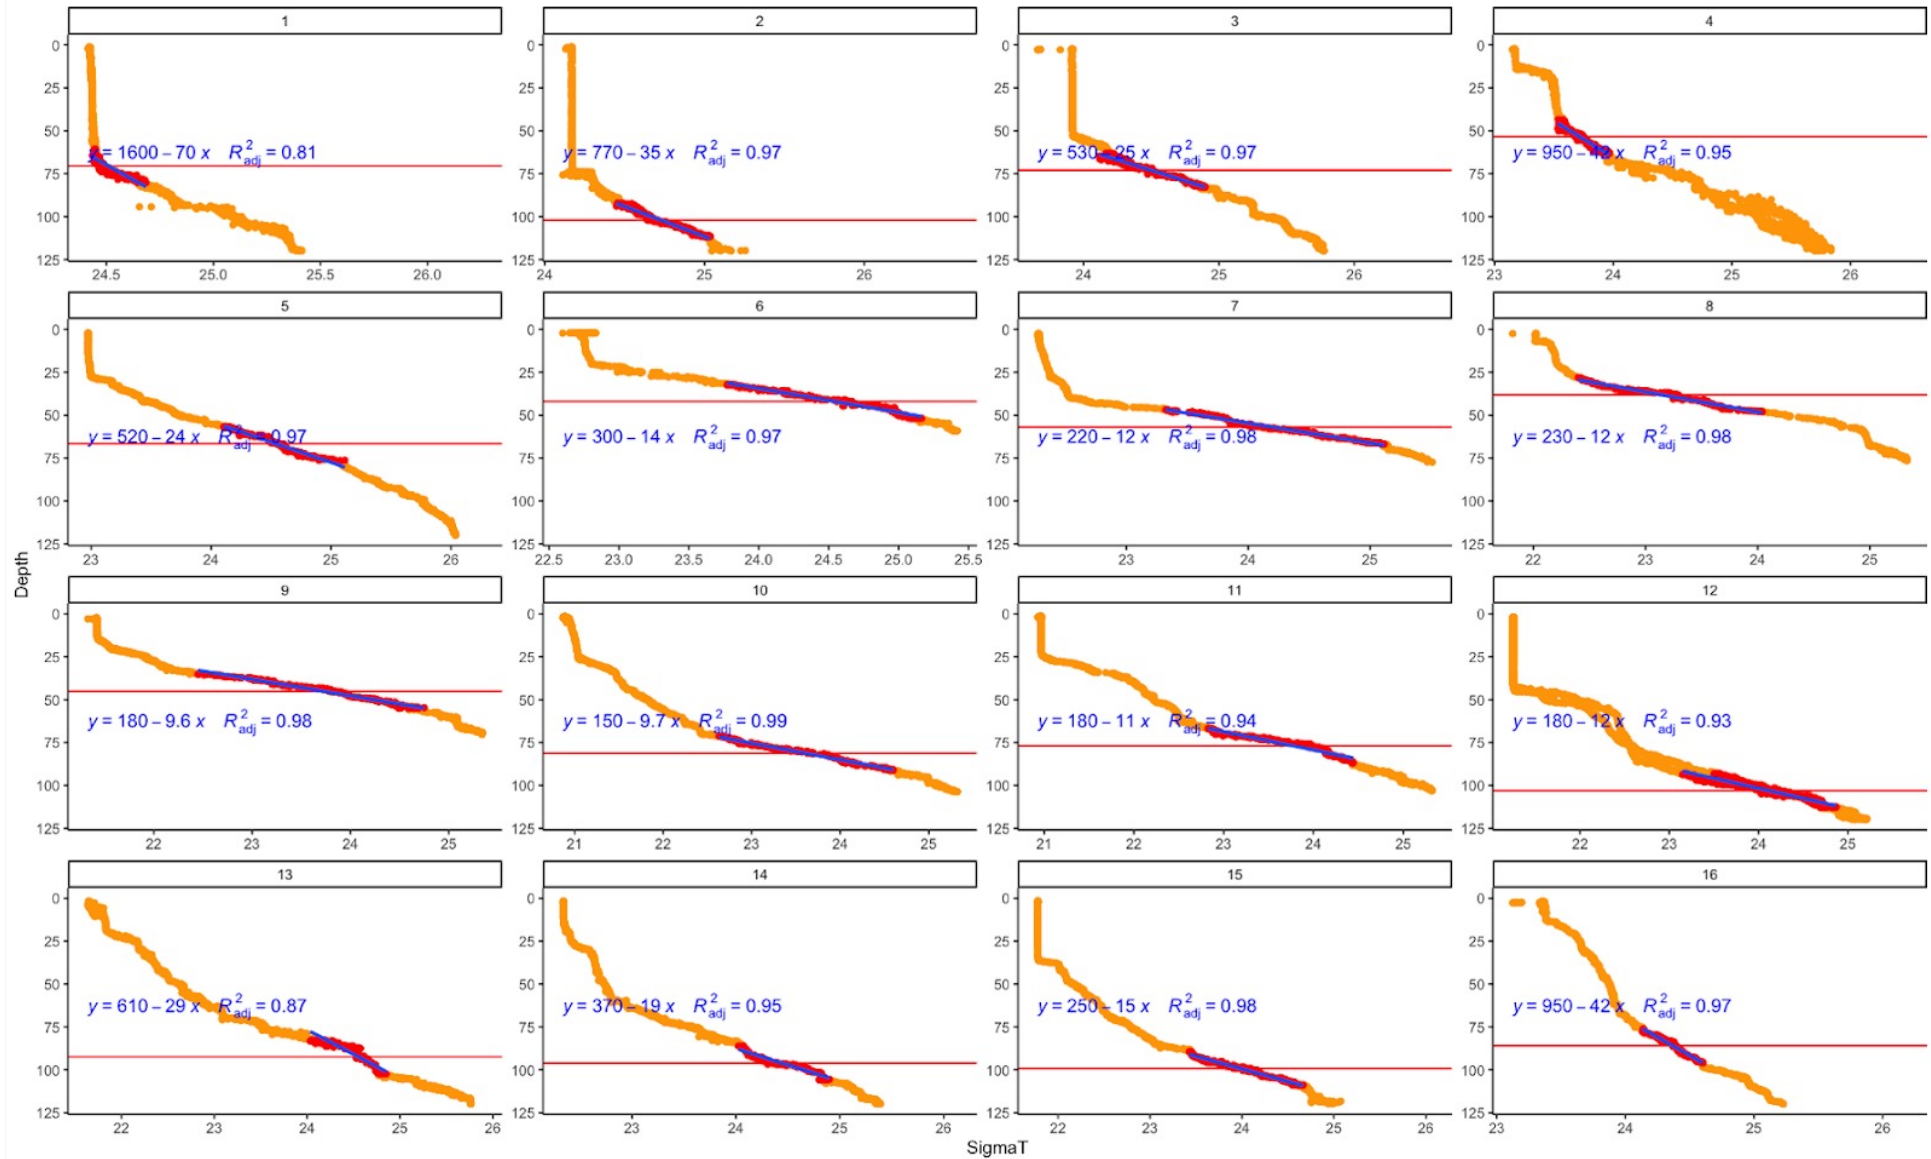

NO3.Red vs Consumption

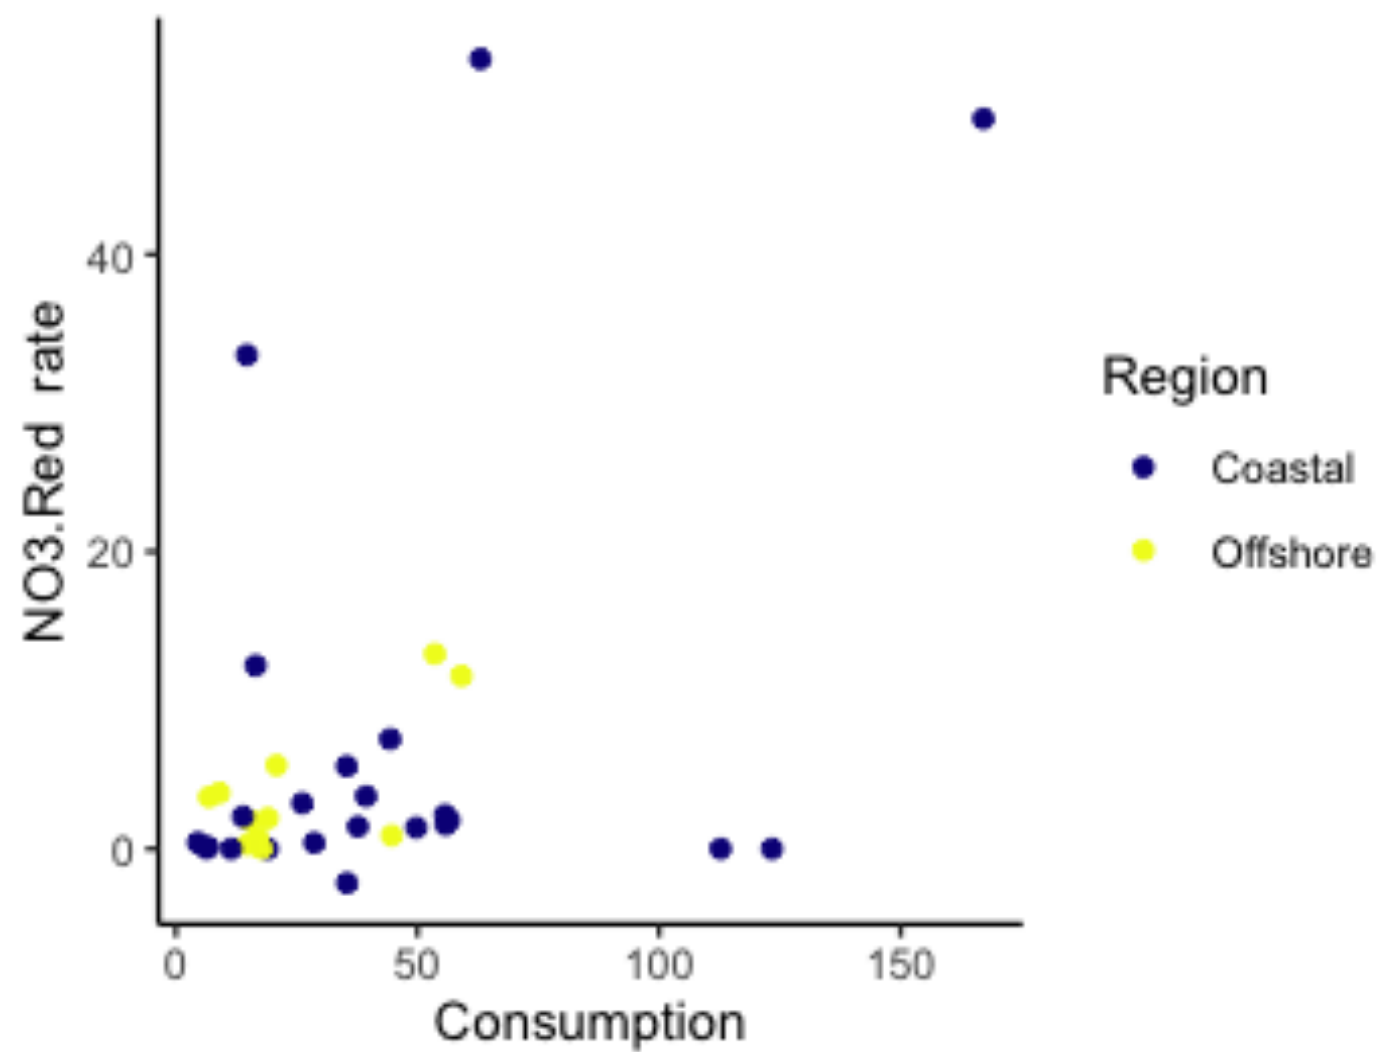

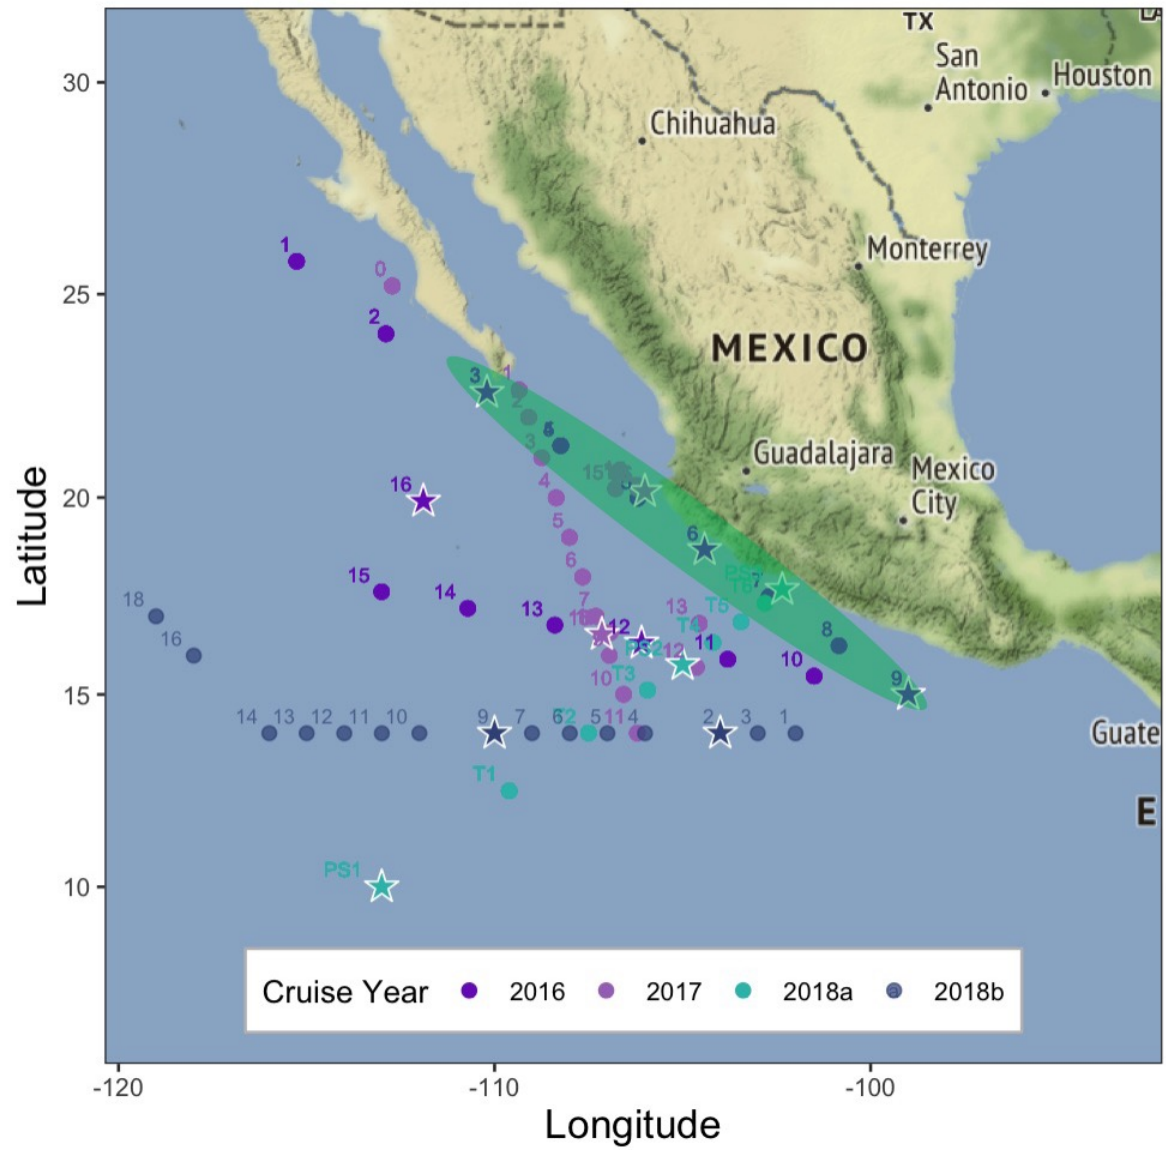



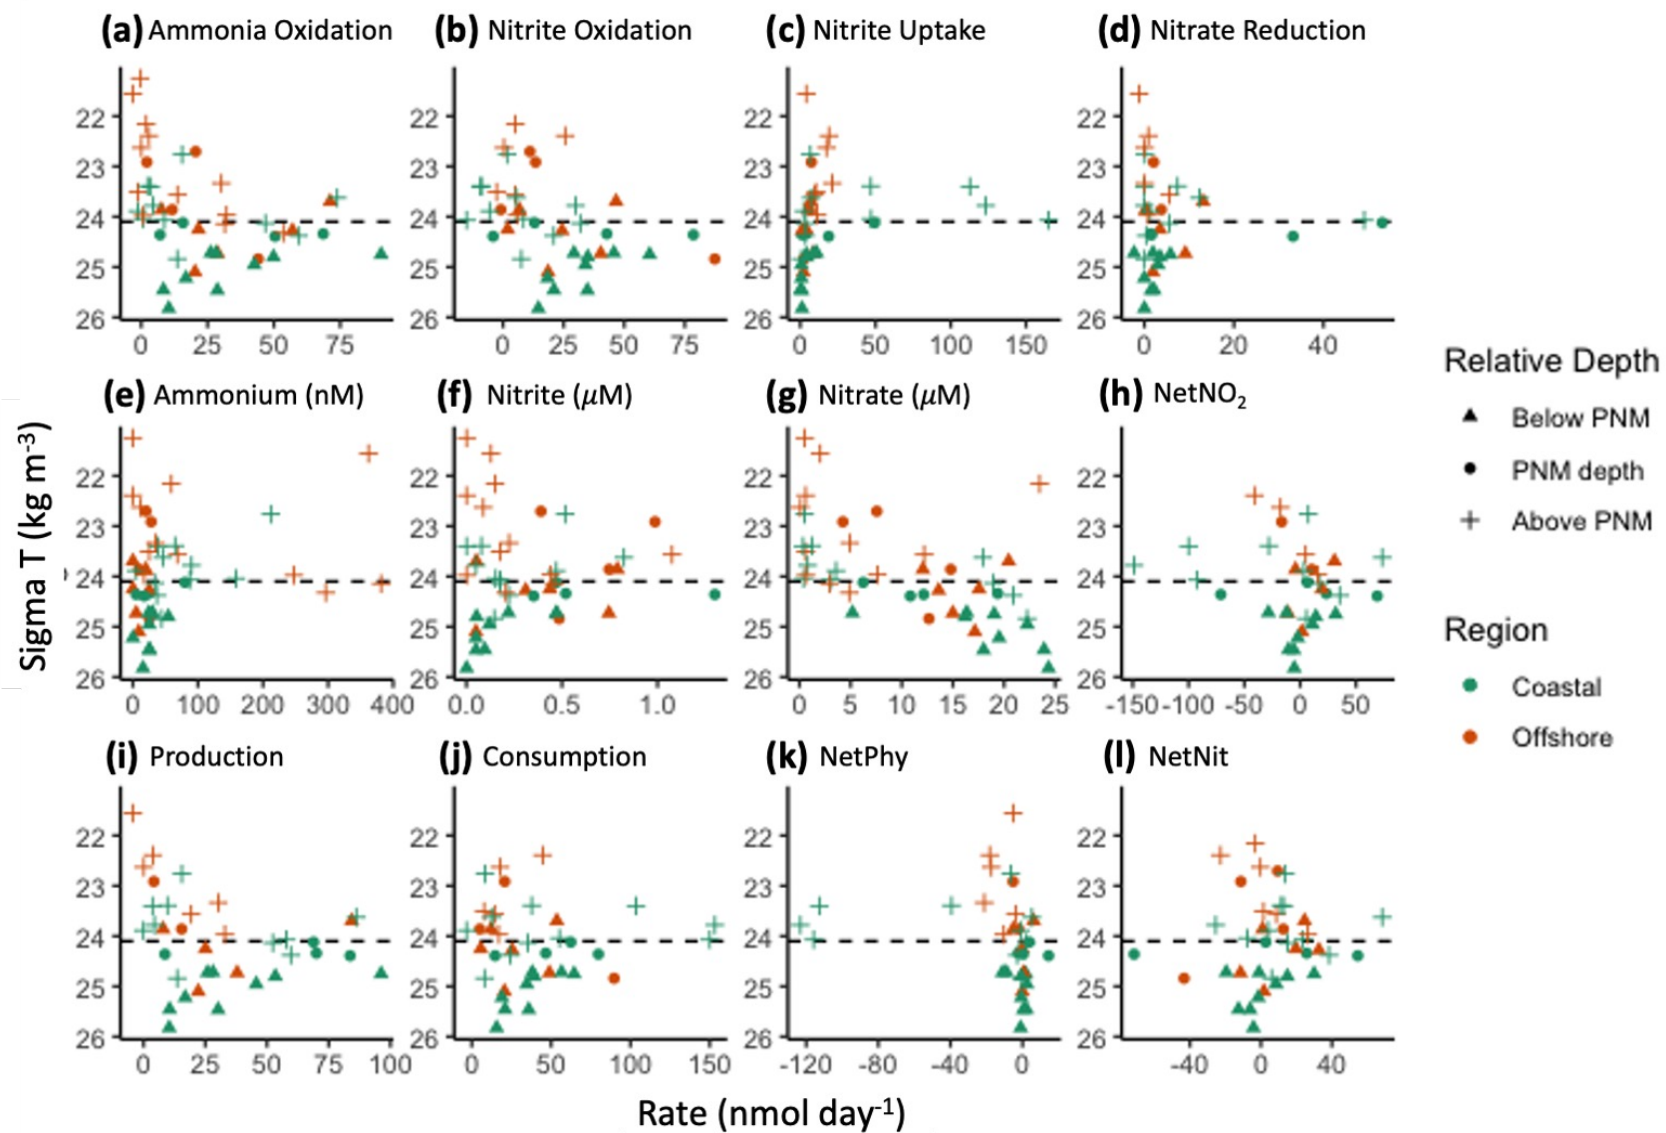

Supplement: Supplementary file [file bg-2022-137-AC1-supplement.pdf]
